# Supplementary material for: Broadly quantifying the roads ahead: SSPs for 188 countries to 2150
Source: Research Square preprint supplement (doi:10.21203/rs.3.rs-7104157/v1), 2025-07-30
Supplement: Supplementary file 1 [file 8a57e3a677d77b07f37f2be0.docx]

**Supplemental Information:**

The following text is broken into two main sections. First, this text describes the most important aspects of the IFs model used in this analysis by describing core model structures and assumptions. Second, this section further explains how the SSP narratives were opreationalized within IFs with a broad desciption of model-based assumptions.

***International Futures***

The IFs population model accounts for change in population flows and stocks distributed by age and sex in both single-year cohorts (FAGEDST) and five-year age groups (AGEDST). Individuals age through these categories over time, with births added to the youngest cohort each year and deaths subtracted from each age and sex group. Unlike births and deaths, migration—the third key population flow—is not modeled endogenously in IFs. Instead, it is based on external long-term flow rate projections from sources such as UNPD and IIASA which computes a net flow for the entire population. Internally, the model distributes overall migrant flows across age groups using an age-specific distribution. Long-term population dynamics in IFs are endogenously driven by changes in fertility and mortality, with migration introduced through externally defined assumptions that can be modified using parameters.

Cohort populations and component flow rates—such as fertility, mortality distributions, and migration rates—are initialized using data from the United Nations Population Division (UNPD), with population data in IFs regularly updated via an automated import tool. The version of the model used for this paper incorporates data from UNPD’s World Population Prospects 2024 1. IFs represents the population using 150 single-year cohorts that advance over time, but for calculating births and deaths, it aggregates these into 31 cohorts—mostly five-year age groups, except for the youngest and oldest.

The cohort population stock in IFs, initialized from empirical data, changes through three flows: births, deaths, and migration. The dynamics of these flows are influenced by distal drivers at the macro level and proximate drivers at the micro level. Consider births as an example—a positive flow added annually to the youngest single-year cohort (age 0). Births (BIRTHS) are calculated by multiplying the number of women in each 5-year age group -within the childbearing age (typically 15–59) by their average fertility rate, defined as the average number of live births per woman in the group, using quinquennial distributions of population by age and sex (AGEDST) and age-specific fertility distribution (FERDST).

*Where, r, c and p stand for region/country, cohort and sex.*

During the projection period, the age-specific fertility distribution (FERDST) is first computed as a gradual shift from the country-specific initial distribution toward a target distribution (ULTIMATEFERTILITY) as GDP per capita (PPP) approaches a threshold of $45,000. This ultimate distribution reflects age-specific fertility patterns typically observed in high-income countries, where reproductive behavior is shaped by factors such as higher educational attainment, increased workforce participation, and delayed childbearing. The model’s core fertility measure is the Total Fertility Rate (TFR)—the average number of children a woman is expected to have over her lifetime based on current age-specific fertility rates. TFR is projected using a combination of distal (socioeconomic and cultural) and proximate (biological and behavioral) drivers. An initial-year adjustment ensures consistency between the historical TFR and the TFR implied by the aggregated fertility distribution.

Total fertility rate (TFR) is projected using a distal-driver formulation that includes adult educational attainment (EDYRSAG15) as an indicator of long-term development, a lagged infant mortality rate (LagInfMor), and contraceptive use estimated from a cross-sectional relationship with GDP per capita at PPP.

Projections of age-specific fertility are reconciled with the total fertility rate (TFR) through a normalization process.

These values are then multiplied by the female population in the corresponding cohorts to compute births, as shown in the first equation of this subsection.

The economic module in IFs is a recursive dynamic computable general equilibrium tool that “chases” equilibrium across time 2,2,2–5. It uses a Cobb-Douglas production function with Solow Residual 6,7 and represents six sectors initialized from Global Trade Analysis Program (GTAP) data 8. Labor force participation rates in the model are driven by demographic changes, such as an aging population in most countries and increasing participation of women in the labor force—particularly in countries with historically low female participation. IFs projects employment in six formal sectors and in informal activities (D. K. Bohl et al., 2015). Skill levels of the labor force change endogenously with educational attainment as projected in IFs. Capital stock evolves based on investment and savings decisions.

The production function serves as the core analytical tool, linking factor inputs—such as capital stock and labor—to economic output in order to forecast potential growth. It incorporates total factor productivity (TFP), which captures the efficiency with which inputs are transformed into output. The model uses an extended formulation of TFP, also referred to as multi-factor productivity (MFP), which is influenced by a broad set of enabling conditions. These conditions are organized in IFs into key clusters, including workforce health and education, infrastructure development, innovation capacity and skills, and effective governance structures.

Effective output, which reflects final demand, is endogenously derived from income and price dynamics and frequently diverges from potential output. This divergence gives rise to disequilibria, manifested as output gaps, unemployment imbalances, and trade imbalances. The IFs modeling framework addresses these imbalances through equilibrating mechanisms—namely price, wage, and financial flow adjustments—implemented not through instantaneous market-clearing conditions but by “chasing” equilibrium over time (so-called “tatonnement” 5).

To simulate this process, the IFs economic module adopts a recursive dynamic Computable General Equilibrium (CGE) framework that models the economy’s iterative convergence toward equilibrium. This framework employs adaptive adjustment mechanisms, including inventory dynamics and partial stock-based responses, to represent the gradual reconciliation of imbalances. It reflects the bounded rationality and myopic behavior of economic agents—households, firms, and governments—who act based on available information about economic stocks and flows. The model is anchored in a Social Accounting Matrix (SAM), which accounts for financial flows among economic agents (households, firms, governments, and foreign entities) and material flows across six key production sectors: agriculture, energy, materials, manufacturing, services, and ICT. This integrated structure enables a broad simulation of long-term structural transformation and demand realization.

Economic growth in IFs is driven by growth in production across six sectors (agriculture, ICT, energy, materials, manufacturing, services). Value added (VADD) in each sector (s) of an economy (r) is computed using a Cobb-Douglas production function (Cobb & Douglas, 1928), where output increases through sectoral labor (LABS) and capital (KS) inputs under constant returns to scale—reflected by alpha parameters (Alpha) summing to one. The third and most important source of sustained long-term growth is multi factor productivity, MFP (TEFF), or the Solow residual (Solow, 1956), which IFs endogenizes and disaggregates extensively to capture its complex, multifaceted drivers. The portion of potential production capacity that is actually utilized is determined by a capacity utilization (CAPUT) variable, which has a long-run target of 0.8 and adjusts over time, particularly in response to inventory buildup. A scaling factor (CDa), computed in the initial year (t=1), ensures consistency between model results and historical value-added data, sourced from the World Development Indicators 9 and the Global Trade Analysis Project (Aguiar et al., 2019).

MFP in IFs evolves over time at a growth rate (MFPGROWTH) driven by convergence toward the global technological leader (mfpleadr), implemented through a country-specific convergence premium (MFPPREMIUM) based on a country’s position in the distribution of global growth. This convergence is made conditional by linking its speed to endogenous development indicators across four clusters: physical (MFPPC), human (MFPHC), social (MFPSC), and knowledge (MFPKN). Each cluster includes a set of variables that are both projected and integrated within the broader IFs system. Their actual effect on MFP growth —positive or negative—is determined by the country’s deviation from the expected value for that variable at its development level, multiplied by a unique parameter for each variable, drawn from the literature and our own analysis. As an illustration, the equation below shows the components of one of the four clusters: human capital (MFPHC). Contributions come from educational attainment of adults (EdYrsContrib), education spending (EdExpContrib), quality of learning (EdQualContrib), vocational education (EdVocContrib), life expectancy (LifExpEdYrsBoost), stunting (StuntContrib), and disability impact (DisabContrib). The contribution from educational attainment, for example, is computed as the difference between projected attainment (EDYRSAG15) and expected attainment (EdYrsComp), multiplied by the impact parameter (mfpedyrs).

Contributions to the social capital cluster come from governance-related indices, including economic freedom, government effectiveness, corruption, regime type, political freedom, and conflict. The physical capital cluster includes contributions from traditional and ICT-related infrastructure indices, spending on infrastructure not captured in those indices, and an energy price term. The knowledge capital cluster includes contributions from R&D spending, trade openness, and the share of science and engineering in tertiary education.

Correction factors (*MFPGLOCOR*, *MFPCOR*) align sectoral MFP growth with the portion of base-year economic growth—obtained from data—that is not explained by capital and labor. The following equation shows all the terms going into the computation of MFP growth (MFPGROWTH)

+ ( +

Historical MFP data from the Penn World Tables and the Conference Board support the formulation and calibration of IFs' productivity dynamics. Users can also exogenously adjust MFP growth using the mfpadd parameter.

Labor participation rate (LABPARR), disaggregated by sex, is initialized using data from the WDI and can evolve over time from its initial level due to long-run distal drivers such as impacts from demographic shifts (e.g., population aging, Aging_Impact), , and development-related increases in female participation (FemParLabMul), as well as immediate proximal factors like wage changes (LabWageImpact).

Employment by sector (LABEMPS) is initialized from GTAP data , using a pre-processing step that aggregates 65 GTAP sectors into six IFs sectors and nine GTAP skill levels into two skill levels represented in IFs. The skill level of labor supply (LABSUP) is projected by initializing base-year values from GTAP data and adjusting the skilled labor share over time based on changes in average years of education of the adults aged 15 and older (EDYRSAG15). The initial value for the share of labor who are skilled (LABSUPSkilledRI) increases with education gains—up to 0.5 percentage points per year of education—but this effect diminishes as the skilled share (PerSkilled) approaches a saturation level of 60%, ensuring alignment with observed patterns of skill demand across countries.

*where*

Labor demand is calculated from sectoral production needs and responds to changes in labor productivity, capital-labor substitution, and relative wages. The model also incorporates skills stratification—linking demand for low-, medium-, and high-skill labor to production patterns and sectoral growth.

With rising economic and technological development, labor demand per unit of output declines for both unskilled and skilled workers, but shifts increasingly toward skilled labor. Sectoral shifts also occur: as agriculture mechanizes, its labor demand drops, while development raises the relative need for skilled workers in both agriculture and manufacturing.

IFs estimates twelve labor requirement functions using employment data from GTAP. These are aggregated into the IFs framework of 6 sectors (s) and 2 skill (sk) types (skilled and unskilled). The employment data are paired with country (r) specific GDPPCP data from the World Development Indicators (WDI) for the most recent period to draw the functions.

The coefficients from these functions (LaborF) are used with projected GDPPCP to compute labor coefficients (LABCOEFFS)—the labor needed to produce one unit of output. These computations are adjusted, as needed, by a number of factors (LabCoeffAdjFac), for example, to account for short-term shocks that may deviate initialized values from long-term patterns, for reconciliation between IFs’ partial equilibrium models of agriculture and energy and the CGE economic model, and for wage-imapcts on labor demand. Final labor demand (LABDEM) is computed by multiplying projected value added (VADD) with these adjusted labor coefficients.

Given the long-term horizon of our analysis, we use a simplified representation of unemployment: starting from the current unemployment rate based on available data and converging to a fixed long-term target over an exogenously specified number of years. Labor demand across sectors is normalized to total employment, calculated by subtracting unemployment from total labor force participation. IFs covers the informal sector, although it is not explicitly endogenized within the sector-disaggregated labor or economic models. Instead, informality is projected as shares of both labor and GDP using separate submodels that interact with each other and are constrained by the total size of the labor force or the economy, as appropriate.

The statistical model of informal labor share is driven by four factors: adult educational attainment, business regulation, corporate tax rates, and household transfers as a share of GDP. The model for informal GDP share is based on the informal labor share, corruption levels, and R&D expenditure as a percentage of GDP. These informality shares influence other parts of the model: the informal GDP share has an inverse relationship with multifactor productivity (MFP) growth, reflecting the low-productivity nature of informal activities, while the informal labor share affects tax revenue, as discussed in the section on government finance.

GTAP data is also used to initialize and compute intersectoral flow matrices that determine how the output of each sector is used by other sectors. The use patterns of intermediate inputs change over time as countries transition between input-output (I-O) structures, driven by changes in their level of development or average income (GDPPCP). The transition from one intersectoral flow pattern to another is implemented through nine representative I-O matrices (AMat), estimated from GTAP data and reflecting different input-output combinations for countries at varying income levels, calibrated to GTAP’s base year (currently 2017). The I-O framework also supports the computation of gross production (ZS)—defined as the sum of output used for intermediate inputs and for final consumption (PFD)—using rearrangement of the equation and matrix inversion techniques standard in linear algebra.

The linkage between income and consumption is dynamic. Household disposable income is calculated by summing earnings from domestic employment (HHINCEARN), remittance inflows (XWORKREMIT), and government transfers in the form of pensions (GOVHHTRNPEN) and welfare (GOVHHTRNWEL), then subtracting payroll and social security taxes—all computed by household type (*h*). Details on taxation and transfers are provided in the government finance section below.

The model computes two measures of inequality: a domestic Gini coefficient (GINIDOM), based on income differences between individuals of two skill types within each country, and a global Gini coefficient, calculated from average income and population across countries and represented through a Lorenz curve. The domestic Gini is adjusted to reflect historical data from WDI and other sources using a multiplicative ratio (GINIDOMRI) and can be further modified through a scenario parameter (ginidomm).

In addition to the Gini index for measuring inequality, IFs also projects absolute economic deprivation by identifying populations below minimum consumption thresholds. It models a lognormal distribution of consumption using the projected mean and Gini index—the latter serving as the dispersion parameter. This distribution enables poverty estimation at various thresholds, including extreme poverty, typically defined as PPP-adjusted daily consumption per person. Population figures for these calculations are drawn from the IFs demographic model described at the relevant section. The economic model described earlier identifies economic growth as the primary driver of household disposable income. Household consumption is generally more stable than income over time, reflecting ongoing needs and life-cycle patterns. Milton Friedman’s *Permanent Income Hypothesis* 10 posits that consumption is based on expected lifetime income and adjusts gradually. Building on this, IFs estimates permanent income (HHINCDISPERM) by driving it with annual GDP growth and smoothing it with actual disposable income (HHINCDIS) using a weighted average.

A preliminary estimate of household consumption (ConsumHHPrel) is computed as a ratio (CRA) of permanent income, with the ratio derived from the most recent available data. This estimate is then adjusted to reflect changes in household savings stocks (HHSavSurStockMul), which influence saving behavior and thus affect the share of income allocated to consumption through an equilibration multiplier.

A target propensity for consumption, expressed as a share of price-adjusted GDP, is calculated using a regression function driven by GDP per capita at PPP (GDPPCP), based on most recent data across all countries. This target estimate is adjusted for public pensions, which are largely consumed. The CRA-based estimate then converges toward the target consumption propensity (CTarget) with a 150 years convergence timeframe (*ConvergeOverTime*) to produce the initial consumption share of GDP (CInitial).

This initial computation is revised (Crev1) with aging related consumption adjustments (AgingAdjustment) that reflect life-cycle savings and consumption patterns, based on the insight from Modigliani (1986) that both the young and the elderly consume a higher share of their income compared to working-age individuals.

While long-term household consumption and saving patterns are shaped by life-cycle and demographic factors, they also respond to market signals—particularly interest rates and price levels. In IFs, both variables are computed dynamically using long-term equilibrium mechanisms linked to inventory stocks. When inventories decline relative to annual production, prices and interest rates rise, prompting households to allocate more income toward savings. The model computes adjustment parameters accordingly and applies them to the initial consumption estimates described earlier. The final value is further adjusted for any scenario-based push on investment. Consumption as a share of GDP is then bounded within a range derived from historical data over the past 20 years. Total consumption is allocated between two household types—skilled and unskilled—initially distinguished by differing propensities to consume. This allocation is normalized to match the total consumption estimate. Finally, consumption is distributed across the population using a distribution function, enabling poverty estimates at various thresholds, as detailed below.

IFs assumes that household and individual consumption spending follows a log-normal distribution, meaning that the logarithm of consumption—not the consumption values themselves—is normally distributed. Based on the expression for the first moment of a log-normal distribution, the mean of consumption (MeanConsumption) is related to the mean (LNMean) and standard deviation (LNStdDev) of the logged consumption values across individuals in the economy (r) as follows:

Mean consumption is also calculated by dividing projected total household consumption by population. Some adjustments are necessary to reconcile this value with the consumption data used in the World Bank’s historical poverty database, which serves as the source of poverty data in IFs. As illustrated by Chotikapanich et al. (1997), the standard deviation of a log-normal distribution can be used to compute the Gini index of inequality. The inverse of that relationship allows IFs to estimate the standard deviation (LNStdDev) of the logged consumption distribution from the Gini index. Knowing any two of the three parameters—MeanConsumption, LNMean, and LNStdDev—enables IFs to compute the third. Once the distribution parameters (LNMean and LNStdDev) are determined, they are used in the cumulative distribution function (CDF) to estimate the share of the population falling below any specified consumption threshold.

Moving from the economic sub-module to governance finance, IFs simulates revenue from taxes (e.g., income, corporate, indirect), expenditures (e.g., education, health, infrastructure), and transfers. Fiscal balance affects public debt accumulation and can influence macroeconomic stability and crowding-out effects on private investment.

Government revenue is calculated in the form of taxes on household and business earnings, along with foreign import tariffs. These are categorized into income taxes (HHTAX), social security/welfare taxes (SSWELTAX) — typically collected from both employees (HHGOVSS) and employers (FIRMGOVSS) — firm income taxes (FIRMTAX), indirect taxes (INDIRECTTAX) such as sales tax, and import tariffs (MTARIFFREV).

*Where, h and s are household types by skill level and economic sectors.*

Revenue from each stream is computed using tax rate functions that respond to the level of development, as represented by GDP per capita at PPP (GDPPCP). As the informal economy lies largely outside the reach of government revenue collection, an adjustment factor (TaxInfAdjustmentFac) is applied to tax rates based on changes in the informal sector’s share of the economy. An equilibration multiplier (MulRev), designed to balance total revenue with government expenditures while maintaining debt within a desired range, further adjusts each of the domestic revenue streams. The equation below shows the model for the business tax stream only.

Additional revenue may come from foreign aid and financial inflows from the World Bank and IMF for countries that are net recipients. The pooled approach to foreign aid in IFs treats all donor contributions as entering a global aid pool, with each donor’s contribution (aiddon) and each recipient’s initial aid share (AidRecPcnt) both initialized from global aid data. The total pool is allocated annually across recipients. Over time, AidRecPcnt declines as recipient income levels (GDPPCP) rise toward a graduation threshold (aidgradpoint), with an optional parameter (aidrecm) enabling scenario-based adjustments..

World Bank and IMF lending in IFs is modeled using a similar algorithm. Total lending is computed from new subscriptions (as shares of donor GDP) and prior-year repayments. Recipient flows are estimated as a share of GDP using a statistical function driven by GDP per capita, income inequality, and aid received, adjusted by each country’s share of total lending in the base year. Total receipts across countries are then normalized. IFs does not track loan cohorts but calculates annual flows directly.

The IFs model simulates government spending by dividing total public expenditure into two main components: transfers and consumption. The modeling process first examines transfers to households (GOVHHTRN), then addresses the calculation of total government consumption, and finally explains how that consumption is divided across administration, education, infrastructure, health, military, and R&D (GDS). A separate section addresses aid outflows. Once all components are accounted for, the model generates a value for total government expenditures.

Government transfers to households are divided into two main categories: pensions for the elderly (GOVHHPENT) and broader social or welfare transfers (GOVHHTRNWEL). Together, these comprise the total government household transfer (GOVHHTRN), calculated using both top-down and bottom-up approaches to ensure responsiveness to macroeconomic and demographic trends.

The top-down approach estimates household transfers as a portion of total government expenditures. This portion is derived from a regression based on GDP per capita at purchasing power parity (PPP) and is adjusted by an initial shift term to match historical data. Over time, this adjusted estimate converges toward the function’s unadjusted value. The model also incorporates the Wagner effect to account for the tendency of public spending to rise with economic development. To refine the estimate further, the model uses an adjusted GDP measure that blends reported GDP with its relative-price-adjusted version (GDPRPA), which accounts for shifts in trade prices—particularly important for countries sensitive to global commodity price changes, like oil exporters. The final top-down transfer value is then scaled by an exogenous scenario multiplier and a dynamic term (MulExp) that aligns government revenues and expenditures over time. Additionally, changes in foreign aid levels are accounted for, with aid split between household transfers and government consumption based on a predefined parameter.

The bottom-up approach, in contrast, builds transfer estimates from demographic and socioeconomic details, especially useful for accurately modeling pensions. This method separately calculates pension and welfare components before summing them. The pension calculation itself is twofold. First, an estimate is generated using a cross-country function of GDP per capita, adjusted for initial data and multiplied by potential relative-price-adjusted GDP. Second, a needs-based calculation uses the size of the retired population (), multiplied by per capita pension levels from the base year, scaled by growth in per capita GDP. The model averages these two estimates to determine bottom-up pension needs. It then applies a cap to prevent per-person pension levels from rising disproportionately if the elderly share of the population increases significantly—limiting pensions to between 70% and 100% of per capita GDP, depending on the retired population’s size. Welfare transfers in the bottom-up logic are similarly based on initial per capita transfer values, scaled by population and adjusted for growth in potential GDP per capita and the expenditure multiplier. Unlike pensions, welfare transfers apply to the entire population, not just the retired. Summing the bottom-up pension and welfare components gives a total bottom-up transfer amount.

To calculate the total transfer value, IFs compares the top-down and bottom-up results and selects the larger value, interpreting it as the greater "pressure" in the system for transfers. However, total transfers are capped at 50% of potential relative-price-adjusted GDP to maintain fiscal sustainability. This total is then split into pension and welfare components based on the proportion derived from bottom-up calculations. The model allocate these transfers across household types (skilled and unskilled). Pension transfers are divided based on each group’s share of total earned income, with optional adjustments through scenario-driven multipliers. If retiree consumption is found to be insufficient in comparison to retirement needs—evaluated using data from the social accounting matrix (SAM)—the model increases pension transfers over time through an endogenous multiplier. Pension transfers are capped at 25% of GDP.

Welfare transfers are initially distributed in proportion to household population shares and may be modified by exogenous multipliers. They are also adjusted based on net inflows from international financial institutions targeted at skilled and unskilled households. Welfare transfers are constrained to be no more than 37% of GDP. Finally, after all adjustments, the model recomputes the total household transfers by summing finalized pension and welfare transfers across all household types, ensuring a consistent and balanced outcome that integrates macroeconomic capacity, demographic trends, and policy interventions.

Government consumption is allocated across sectors like education, health, core and other infrastructure, military, R&D and Other. This section introduces the structure of that model including the bottom-demand for education, health, and core infrastructure, the inclusion of private spending in health, infrastructure, and R&D, the military spending's reliance on an action-reaction model, and the impact of international financial institution flows on education and health. The final allocation process integrates a top-down and a bottom-up approaches.

The initial GDS calculation uses a top-down approach with cross sectional models based on GDP per capita at PPP to estimate expected spending as a percentage of GDP for most sectors. These estimates are adjusted using initial year data and gradually converge to the function-based values. Infrastructure spending relies solely on bottom-up calculations.. Public spending on defense is computed using a GDPPCP based function. IFs also compute a “other” spending sector that holds the difference between the total government consumption spending and the sum of all of the public sector-specific expenditures. For core infrastructure, health, and education, the model also incorporates bottom-up cost calculations. These bottom-up demands for health and education are then balanced with the top-down estimates using a weighting parameter.

Finally, the model reconciles the total estimated GDS with the total government consumption (GOVCON). If the sum of GDS exceeds GOVCON, a normalization process occurs. This process includes mechanisms to protect spending in categories with user-defined GDP targets or those prioritized by the bottom-up balancing parameter. The remaining budget is then allocated proportionally to the unprotected spending categories. If there's no budget constraint, the set-aside values are maintained. This ensures that the total allocated spending aligns with the available government consumption while accommodating user-defined priorities and bottom-up needs.

IFs represents education by modeling schooling by grade and sex for primary through tertiary education that then drives patterns of educational attainment in adult populations 11–13. The model is driven by government spending and educational attainment has a relationship with productivity, driving economic outcomes. In addition to modeling schooling and attainment, the education model also represents educational quality by reading and writing and schooling level and has specific representations of vocational training as well as science, technology and engineering graduates.

The education model’s strength lies in its ability to endogenize education within a broader socio-economic context and to track individuals and financial flows through the education system in a way that reflects both policy decisions and structural conditions. The model uses a stock-and-flow structure to track student progression through the education system, the resources required, and the resulting educational attainment of the adults. IFs also projects quality of learning for students at the primary and the secondary level.

The schooling-flow part of the education model projects enrollment, progression, and graduation by gender for each country across four levels: primary, lower secondary, upper secondary, and tertiary. It tracks student flows grade by grade, simulating advancement, repetition, and dropout. Grade-specific flows are initialized using historical grade-level data where available, or reconstructed from level-specific data using simplifying assumptions—such as stable flow rates over the typical duration of the schooling level. Each year, student flow rates are projected using regression functions driven by GDP per capita at PPP—an output of the IFs economic model and thus endogenized—used as a proxy for development level and educational demand. Country-specific variation in the dependent variable is accounted for as a difference from the function estimated in the initial year. Separate functions for girls and boys capture gender-specific differences in educational progression.

Enrollments are updated each year by advancing students through grades, adjusting for dropouts and repeaters. New entrants are added at the first grade, while graduates exit at the final grade and transition to the next level. Flow rates, when multiplied by the relevant age-group population, produce student counts. Grade-specific flow rates are then aggregated to derive flow rates for each education level. These flow dynamics—and the resulting enrollments—are influenced by budget availability, as discussed in the next section.

The education model forecasts public education funding by balancing projected demand with available budgetary supply. Demand is calculated based on enrollment levels and per-student public spending, while supply is constrained by the government’s overall budget. Any surplus or shortfall in funding influences student flow rates. The IFs model does not currently represent household spending on education. Per-student public spending is projected for each education level and country using regression functions driven by GDP per capita (PPP)—an indicator of wage levels in the country—reflecting the fact that most public education spending goes toward teacher salaries and staff compensation (OECD, 2023). Country-specific deviations from the estimated spending levels are captured in the initial year and are assumed to gradually converge toward global patterns over time. Total funding demand—computed by multiplying enrollment projections by per-student costs—is then constrained by fiscal limits set within the IFs sociopolitical model. This model allocates public spending across competing sectors such as health, infrastructure, defense, and R&D, based on historical expenditure patterns and levels of development, as elaborated in the section on public finance.

The allocated education budget is compared to projected funding needs. Surpluses or deficits affect student flow rates across all education levels, either augmenting or reducing them as described in the IFs education model documentation. These adjusted flow rates feed back into updated enrollment projections. Any remaining funding gap is resolved by scaling per-student expenditures to align with the allocated budget. Users can influence education budgets either directly through scenario-based modifications to budget parameters, or indirectly by adjusting student flow rates, which in turn affect enrollment and funding requirements.

The education model projects attainment, defined as the average years of schooling and the highest level completed among individuals aged 15 and older. Initial attainment levels, disaggregated by five-year age groups and sex, are based on historical data. These levels evolve as individuals enter the 15–19 and 20–24 age groups, bringing with them either completed schooling of a given level or partial attainment. Projections of graduation and dropout rates from the schooling-flow model are used to estimate attainment for these younger cohorts. As individuals age and transition across age groups—tracked by the integrated demographic model—they carry their attained education with them. The model does not currently represent formal education pursued later in life. Projected educational attainment drives the productivity and skill levels of the labor force and broader economic system in IFs This structural integration enables evaluation of how today's policy decisions in the education sector shape future human capital profiles and contribute to both growth and distribution. The impact of educational attainment on demography and health is discussed in the respective sections.

IFs education model integrates learning quality alongside enrollment and completion to capture a more comprehensive picture of education outcomes. It uses a harmonized dataset developed by Altinok, Angrist, and Patrinos (2018), drawing on international assessments like PISA, TIMSS, PIRLS, and regional tests such as SACMEQ and LLECE. Covering 128 countries from 1965 to 2010, the dataset is available via the World Bank’s education statistics. The model forecasts learning quality in three steps: (1) projecting an initial quality score based on adult educational attainment; (2) adjusting for education spending—with diminishing returns from further spending and leakage from corruption—and security conditions; and (3) estimating subject-specific and gendered scores for reading, math, and science. This enables forward-looking analysis of how structural, financial, and contextual factors shape educational performance.

IFs health model projects age- and sex-specific mortality across 15 distinct causes of death and includes corresponding projections of morbidity. Causes of death—including diarrheal diseases, HIV/AIDS, malaria, respiratory infections, cardiovascular diseases, diabetes, digestive disorders, cancers, mental health conditions, respiratory diseases, and various injuries—are grouped into three broad categories: communicable diseases, non-communicable diseases, and a third category for injuries and accidents.

The drivers of health outcomes—such as disease prevalence and death rates—are generally classified as proximate drivers, which are immediate biological or behavioral risk factors (e.g., undernutrition), and distal drivers, which include broader social, economic, and environmental factors such as income and education. The IFs health model integrates and extends two major global health modeling approaches to represent these drivers: the distal-driver framework from the Global Burden of Disease (GBD 2024) study, led by the Institute for Health Metrics and Evaluation (IHME) at the University of Washington, and the relative risk (RR) ratio formulation from the World Health Organization’s Comparative Risk Assessment (CRA) project for proximate drivers. These approaches are unified in IFs into a single structural platform that links proximate and distal determinants of health.

In the distal formulation, age- (c) and sex- (p) specific mortality rates (ModMorDstDet) for different causes of death (d) in a country (r) are projected using a nonlinear mixed-effects regression model developed in the Global Burden of Disease (GBD) study. This model relates mortality rates to key distal drivers: human capital, measured as average years of education of adults aged 25 and older (EDYRSAG25); income per capita in PPP dollars (GDPPCP); time (IY), defined as years since 1900 as a proxy for technological progress; and smoking impact (HLSMOKINGIMP). IFs implements this formulation - shown in the next equation- with the intercepts (Constant) and coefficients (β1, β2 etc ) collected from Mathers and Loncar (2006), to estimate cause-specific mortality rates. To bring consistency between the model estimates and death rate data from GBD, total death counts from UNPD, and driver values from the IFs historical database, the model computes scaling factors in the base year, which are later applied to the model-generated mortality rates.

In addition to the general distal-driver formulation for forecasting cause-specific mortality and morbidity, IFs applies alternative methods for select causes such as malaria, respiratory infections, mental health, and traffic injuries. For some detailed causes (e.g., diarrheal diseases), IFs uses elasticity-based adjustments within broader cause groups, based on coefficients from the GBD study. Smoking impact is modeled structurally through a reconstructed historical series of smoking rates, extended beyond 2030 using GDP-based patterns and a lagged relationship between smoking and health outcomes. HIV/AIDS and traffic deaths are also modeled structurally: HIV through a bell-shaped prevalence curve with scenario controls, and traffic injuries through vehicle fleet growth and income-driven saturation effects.

The proximate-driver approach based on WHO’s CRA project (Ezzati et al 2004) refines distal formulation based mortality forecasts by incorporating specific health risk factors, using relative risk (RR) ratios that measure how much more likely a health outcome (such as disease or death) is in a group exposed to a risk compared to one that is not. The method is applied to eight key proximate risk factors in IFs, each mapped to specific diseases and age groups. The impact of a specific risk factor is captured through the population attributable fraction (PAF) which represents the proportion of death that could be avoided if exposure to that risk factor were reduced to its theoretical minimum. Thus, the farther the exposure level from the theoretical minimum of exposure, the closer the PAF to 1.

Multiplying the baseline mortality rate of a disease by the PAF estimates the number of preventable deaths if a risk factor were minimized. Assuming relative risks and the ideal exposure level are constant across countries and time, changes in the PAF directly reflect changes in the population's exposure to that risk factor, highlighting the necessity of forecasting these exposure levels.

The IFs model links specific risk factors to diseases by age group—for example, childhood underweight increases the risk of diarrheal diseases, malaria, and respiratory infections in children under 5. High body mass index (BMI) and obesity raise the risk of cardiovascular diseases and diabetes in adults over 30. Smoking raises the risk of cancer, cardiovascular, and respiratory diseases in adults over 30, while indoor air pollution affects both children (via respiratory infections) and adults (via chronic respiratory disease). Environmental risks like unsafe water and air pollution contribute to diarrheal and cardiovascular diseases, and climate change is modeled to impact communicable diseases in young children. Road traffic fatalities are projected using vehicle ownership and fatality rates across all age groups.

Forecasts of population exposure to these risk factors are drawn primarily from other integrated IFs models—for example, malnutrition projections come from the agricultural model, and indoor air pollution is estimated using projections of cookstove use by fuel type. For some conditions, such as BMI and obesity, future exposure levels are projected within the health model itself using historical trends, GDP per capita relationships, and structural assumptions such as a 25-year lag between smoking rates and their health impact.

By calculating PAFs under both distal-only and full (proximate-inclusive) assumptions, IFs adjusts mortality forecasts using the ratio of weighted average relative risks, correcting for under- or overestimation in the initial distal-only projections. This enables the model to more accurately reflect the dynamic impact of specific, or "proximate," health risks—such as undernutrition, smoking, or indoor air pollution—on cause-specific mortality across age groups and diseases.

IFs Health model thus endogenizes the projection of both distal drivers and risk factors within a single system. It also enables analysis of health outcomes in relation to “super-distal” drivers—systemic forces such as governance, technological change, environmental conditions, and sociopolitical stability—that shape both distal variables and the distribution of proximate risks. For example, IFs’ socio-political and environmental modules influence undernutrition and indoor air pollution—key proximate risks—while also affecting socioeconomic outcomes like income and education that serve as distal drivers.

The IFs model forecasts morbidity by linking changes in years lived with disability to changes in years of life lost, following the GBD approach. This approach generally assumes that disability declines at a rate equal to or less than the decline in mortality. A key implication of this is a projected shift in the total disease burden from mortality towards disability over time. However, the model's limitation lies in not explicitly accounting for the differing impacts of prevention (reducing both incidence and prevalence) versus treatment (primarily affecting prevalence). It also doesn't fully capture how reduced disease severity alongside increased survivorship might influence the overall burden of morbidity.

Finally, IFs captures feedback loops through which health outcomes themselves influence distal and super-distal drivers—such as through improved labor productivity, reduced poverty, and increased educational attainment—enabling dynamic analysis of the reciprocal relationship between health and long-term development trajectories. Governance is conceptualized to have three components that represent distinct transitions from concerns about security, to the building of state institutions, and finally towards making the polity more inclusive 14,15. These dimensions are grounded in historical analysis of governance evolution across countries, selected for their centrality to state-building and institutional development. Together, they capture governance functions: maintaining stability (security), delivering public goods and managing resources (capacity), and fostering participation and equity (inclusion).

For the security dimension, IFs projects potentials for state failure and fragility using two probabilistic measures: one representing internal conflicts such as revolutionary war, ethnic war, and genocide or politicide, and another capturing vulnerability to political instability and adverse regime change (Esty et al. 2005). The two models use a similar approach and we describe the conflict model here.

The country-level probability of intrastate conflict (SFINTLWAR) is modeled using structural drivers such as infant mortality (INFMOR), trade openness (TRADEOPEN), youth bulge (YTHBULGE), GDP growth rates (GDPMA), a continuous measure of regime type (POLITYDEMOC), and an indicator of ongoing conflict—represented by a moving average of the country’s own conflict probability in earlier forecast years (SFINTLWARMA). The model is initialized using data from the Political Instability Task Force (PITF; now maintained by the Center for Systemic Peace). While the initial formulation is statistically estimated, dynamic adjustments are introduced to account for non-monotonic behaviors—such as the inverted U-shaped relationship between regime type and conflict, where anocracies are more prone to instability than either autocracies or democracies, and threshold effects beyond which certain drivers weaken. These adjustments were derived through projections from model runs spanning 1960 to the most recent historical data, compared against observed patterns of intrastate war 16.

The institutional quality and capacity of the state are modeled by representing a) government revenues through taxation and aid which are then spent on sectoral consumption (via categories representing education, health, infrastructure, security and administrative needs) as well as transfers (for both pensions and welfare); and b) the quality of governance through a couple of indicators from the Worldwide Governance Indicators (WGI) from the World Bank 17 as well as Transparency International’s (TI) Corruption Perception Index, CPI 18. The government revenue and expenditure model is described in detail within the economic model methodology. The WGI variables for government effectiveness and regulatory quality are driven by the level of development, educational attainment of the population aged 15 and above, and the impact of conflict—using a model structure similar to that of the corruption indicator. Corruption (GOVCORRUPT) in IFs is modeled using the Transparency International Corruption Perceptions Index (CPI), treated as a measure of transparency. The core formulation includes four key drivers—GDP per capita at PPP (GDPPCP), the Gender Empowerment Measure (GEM), level of democracy (DEMOCPOLITY), and dependence on energy exports (calculated as energy exports as a share of GDP, using energy export volume (ENX), energy prices (ENPRI), and total GDP)—which together explain a large share of cross-country variation. An additive adjustment term is computed in the initial year to reconcile model estimates with observed data—capturing omitted factors such as path dependence or cultural variation—and is applied in subsequent years, gradually converging to zero over time. The computation is further adjusted to reflect the impact of conflict in increasing corruption, using a factor derived through experimentation with historical data.

Inclusion is represented using two indices, one capturing the level of democracy measured by the Polity Index 19 using a statistical formulation driven by the Gender Empowerment Measure (GEM), youth bulge, and dependence on energy exports (ENX) as a share of GDP as shown in the equation below.

Country-specific variation is incorporated through an initial-year adjustment—computed as the difference between observed and model-predicted values—which gradually converges to the model’s projected path over time.

IFs includes a representation of infrastructure that captures different dimensions of access driven by government finance 20. The model includes a representation of electricity access and generation capacity

For each infrastructure type, the model is initialized with country-specific historical data on infrastructure stocks—measured in physical units (e.g., kilometers of road, gigawatt-hours of power generation, or number of mobile phone connections) and often expressed in comparable relative terms (e.g., roads per unit of land area, or percentage of population with access to electricity or clean water). IFs primarily uses data from the World Development Indicators (WDI 2025), which aggregates infrastructure stock and access data from a variety of international sources. For specific infrastructure types, IFs draws on:

- ICT data from the International Telecommunication Union (ITU),
- Road data from the International Road Federation,
- Irrigation data from FAO’s AQUASTAT, and
- WASH data from the WHO/UNICEF Joint Monitoring Programme (JMP).

The model also incorporates data on the lifetime of physical infrastructure and cost estimates for building new units or maintaining existing ones. These are drawn from recent literature and global datasets, typically reported as standardized global values or, in the case of costs, relative to income levels across different country income groups.

Infrastructure projections in IFs begin with an estimate of expected infrastructure stock, typically derived using analytic functions—linear or logistic, depending on whether the dependent variable is categorical or continuous. These functions are driven by a set of distal drivers relevant to each infrastructure type. The following equation illustrates this for drinking water services (WATSAFE). The specification, denoted as *f*, represents a multinomial logistic model that simultaneously estimates the probabilities of all three mutually exclusive categories of water service types (subscript *i*) for a given country (subscript *r*) at a point in time (*t*), as a function of key socio-economic drivers: per capita income in PPP dollars (GDPPCP), extreme poverty rate (INCOMELT1CS), educational attainment (EDYRSAG25), and health spending as a share of GDP (GDS(Health)). Cross-country variability is addressed by computing the difference between model projections and historical data or base-year estimates. A portion of this difference is added to the model-projected values (CalWATSAFE) in subsequent years. This adjustment gradually declines over time, as each country’s values converge toward the analytic function. The rate of convergence is governed by the parameter *(watsanconv)*, which is determined through judgmental evaluation of model runs using alternative values.

The need for new infrastructure construction is determined by subtracting the existing stock from forecasted requirements, then multiplying the gap by the projected unit cost for each type of infrastructure to estimate total funding needs. For infrastructure variables expressed as access rates—such as WASH or electricity—the model first converts access into physical units (e.g., household connections) by multiplying the access rate by population and average household size, as projected in the IFs demographic model.

Due to the lack of consistent, country-level data on construction costs, the model currently uses a uniform global cost. We assume these costs—particularly labor-related components—rise with national income and wages. Therefore, we scale costs linearly from a lower to an upper bound as a country’s income increases from $x PPP to $y PPP, using values drawn from global literature. Funding for maintenance and rehabilitation is based on the current infrastructure stock. We estimate the cost of replacing a fraction of this stock each year, such that the entire stock would be renewed by the end of its average lifetime. As with costs, we use global averages for lifespans, not country-specific adjustments for climate or wear-and-tear factors. The budget demand is passed to the government finance model, where a budget allocation algorithm distributes funds across public spending sectors. Before applying the allocated government funds in the infrastructure model, an additional assumption is made regarding the split between public and private investment, based on an 80-20 rule. For traditional infrastructure, it is assumed that 80% of investment comes from the public sector, while for ICT infrastructure, 80% is assumed to come from the private sector.

Construction and maintenance levels are adjusted—scaled back or expanded—based on whether there is a funding deficit or surplus. In the case of a surplus, the model limits the pace of additional infrastructure development, placing excess funds into a pool that is gradually deployed over subsequent years. Recognizing that infrastructure systems evolve incrementally due to their capital-intensive and long-lasting nature, the model incorporates inertia—where past investments and existing structures strongly influence future development. The final level of infrastructure has forward linkages to other sectors—for example, WASH infrastructure influences the incidence of diarrheal diseases. The resulting health impacts affect the labor force and productivity, which in turn influence income levels. This, in turn, feeds back into the demand for infrastructure.

IFs includes other representations as well, including of agriculture 23,24, gender 25, energy 26, the environment 27 and international relations 28,29, each dynamically linked to the overall model. This manuscript does not go further into detail about those sub modules because they were not instrumental in the calculation of the SSPs, which are introduced in the following section.

**Operationalizing the SSP Narratives in IFs**

Creating *quantified SSP extensions* begins with the SSP narratives 30. Modeling scenario narratives is a complex challenge because it relies upon the interpretation and application to quantitative models—inevitably, some aspects of the narratives are easier and more challenging to represent. To move through this challenging space, we began by dissecting the SSP narratives on a sentence-by-sentence basis, using this structured approach to identify parameters within IFs that could be used to represent these qualitative stories. We present the details of that work below.

The first challenge to operationalizing these narratives was to anchor a baseline scenario in IFs to one of the storylines. IFs was designed around a central tendency scenario referred to as the *Current Path*. This scenario attempts to present a “most likely” long-term and integrated development forecast that reflects a continuation of development trends within and across systems and generally reflects an SSP2 narrative. The *Current Path* scenario in IFs is not a simple extrapolation and reflects a dynamic unfolding of systems in interaction. Some of the key features of this scenario include economic transformations away from agriculture and towards higher value-add production as countries develop, reduced fertility rates and lower communicable disease prevalence, improved governance capacity and reduced threat of conflict, and virtuous cycles of increased economic growth, investment in education, health, and infrastructure, which then unlocks future development outcomes. The *Current Path* scenario is one that generally reflects improvements in human development following a general “modernization” approach.

While the scenario is generally positive, there are negative factors that also constrain future patterns of human development. For example, this scenario reflects the reality that many countries are not on pace to achieve the Sustainable Development Goals and challenges associated with poor development pocket the globe 31. Aging populations and government debt drive challenges in many more developed parts of the world. The world is dominated by fossil fuel production and, while a transition to renewable energy does occur, it takes significant time, leading to a large-scale build-up of carbon in the atmosphere and forward effects from climate change to inequality, agricultural production, and economic growth. For this exercise, SSP2 was built around the *Current Path* scenario with small adjustments that eliminated any forward effect from climate change 32 while bringing the conflict module in line with recent research 16.

Next, to build the other four SSP scenarios, we interrogated the SSP narratives line-by-line. We used this qualitative interrogation and built model-based assumptions about each of these narratives to reflect the IFs structure while also trying to reflect how others have developed scenario-based assumptions to reflect the SSP narratives in various quantitative research outputs. Each of the scenario interventions made in this exercise are reported in Appendix *Implementation in IFs* and our translation of scenario narratives into IFs implementation is detailed in Appendix *SSP Narratives and IFs Interpretation.* Appendix *Scenario Assumption Compared with Literature* compares how our model-based interventions compare with already published Quantified SSP Elements as well as SSP Extensions.

Table 1: Connecting the SSP Narratives to IFs

| **SSP1** | **IFs Interpretation** |
| --- | --- |
| The world shifts toward a more sustainable path, emphasizing more inclusive development that respects perceived environmental boundaries. | Reduced working days in high income countries followed by other income groups. |
| Increasing evidence of and accounting for the social, cultural, and economic costs of environmental degradation and inequality drive this shift. | Improvement in income inequality as well as the distribution of calories per capita. |
| Management of the global commons slowly improves, facilitated by increasingly effective and persistent cooperation and collaboration of local, national, and international organizations and institutions, the private sector, and civil society. | This drives our improvements in governance. We also increase trade openness and integration. We also reduce the prevalence of intrastate conflict. |
| Educational and health investments accelerate the demographic transition, leading to a relatively low population. | Population peaks and declines by 2150. Mortality for all types is reduced significantly. The financing of health and education grows while we also simulate additional improvements in health outcomes and educational schooling outcomes. |
| Beginning with current high-income countries, the emphasis on economic growth shifts toward a broader emphasis on human well-being, even at the expense of somewhat slower economic growth over the longer term. | Increased leisure time starting in high income countries with other income groups following. Increases in household cash transfers are also imposed starting in high income economies as well to simulate a mandatory minimum income. These changes are imposed on upper middle income economies by 2050 and lower middle income economies by 2085. |
| Driven by an increasing commitment to achieving development goals, inequality is reduced both across and within countries. | Within country inequality reduced by 40% by 2150. Cross-national productivity improves dramatically across time and income groups. |
| Investment in environmental technology and changes in tax structures lead to improved resource efficiency, reducing overall energy and resource use and improving environmental conditions over the longer term. |  |
| Increased investment, financial incentives and changing perceptions make renewable energy more attractive. |  |
| Consumption is oriented toward low material growth and lower resource and energy intensity. |  |
| The combination of directed development of environmentally friendly technologies, a favorable outlook for renewable energy, institutions that can facilitate international cooperation, and relatively low energy demand results in relatively low challenges to mitigation. | Better governance, improved incentives to reduce emissions, improved energy intensity and efficiency, improved access to electricity. |
| At the same time, the improvements in human well-being, along with strong and flexible global, regional, and national institutions imply low challenges to adaptation. | Multidimensional improvements in human well-being including improvements in access to water and sanitation. |
| **SSP2** | **IFs Interpretation** |
| The world follows a path in which social, economic, and technological trends do not shift markedly from historical patterns. | This is the conceptual underpinning of the Current Path scenario in IFs. |
| Development and income growth proceeds unevenly, with some countries making relatively good progress while others fall short of expectations. | This occurs in the Current Path--for example, Low Income and High Income GDP per capita (at PPP) remains below values in 1960 through 2080. |
| Most economies are politically stable. | In 2024, 23 countries (out of 188) are estimated to experience domestic violent instability. In this scenario this number reduces to 10 by the end of the century and 7 by 2150. |
| Globally connected markets function imperfectly. | We continue patterns of trade openness that have taken place since around 2008, keeping global trade openness relatively flat. |
| Global and national institutions work toward but make slow progress in achieving sustainable development goals, including improved living conditions and access to education, safe water, and health care. | Malnourished population cut in half by 2050, piped water connections reach 95% by 2100, net secondary reaches 95% by 2120. |
| Technological development proceeds apace, but without fundamental breakthroughs. | We continue to improve energy efficiency and reduce the cost of renewable energy, though these patterns do not diverge significantly from recent history. |
| Environmental systems experience degradation, although there are some improvements and overall the intensity of resource and energy use declines. |  |
| Even though fossil fuel dependency decreases slowly, there is no reluctance to use unconventional fossil resources. |  |
| Global population growth is moderate and levels off in the second half of the century as a consequence of completion of the demographic transition. | Population peaks in 2080 at 10.3 billion and declines to 8.3 billion by 2150. |
| However, education investments are not high enough to accelerate the transition to low fertility rates in low-income countries and to rapidly slow population growth. | Low-income fertility declines by 50% by 2080 relative to 2024. |
| This growth, along with income inequality that persists or improves only slowly, continuing societal stratification, and limited social cohesion, maintain challenges to reducing vulnerability to societal and environmental changes and constrain significant advances in sustainable development. | Inequality grows slightly, from 0.38 to 0.39 by 2050 then declines to 0.36 by 2100 |
| These moderate development trends leave the world, on average, facing moderate challenges to mitigation and adaptation, but with significant heterogeneities across and within countries. | Inequality persists within and across countries, and heterogeneity persists. |
| **SSP3** | **IFs Interpretation** |
| A resurgent nationalism, concerns about competitiveness and security, and regional conflicts push countries to increasingly focus on domestic or, at most, regional issues. | Trade interdependence reduces, migration is low, intrastate conflict is higher. |
| This trend is reinforced by the limited number of comparatively weak global institutions, with uneven coordination and cooperation for addressing environmental and other global concerns. | Governance effectiveness is reduced, there is no carbon tax. Trade openness falls to levels not seen in the recent past. |
| Policies shift over time to become increasingly oriented toward national and regional security issues, including barriers to trade, particularly in the energy resource and agricultural markets. | Trade and migration are reduced. |
| Countries focus on achieving energy and food security goals within their own regions at the expense of broader-based development, and in several regions move toward more authoritarian forms of government with highly regulated economies. | Multifactor productivity is reduced and development targets are widely missed. |
| Investments in education and technological development decline. | Government finance of education, infrastructure and health all reduce. Education schooling outcomes are reduced as are health outcomes. Access to electricity and water and sanitation suffer as well. |
| Economic development is slow, consumption is material-intensive, and inequalities persist or worsen over time, especially in developing countries. | The distribution of income and calories is made worse and there is no dematerialization. |
| There are pockets of extreme poverty alongside pockets of moderate wealth, with many countries struggling to maintain living standards and provide access to safe water, improved sanitation, and health care for disadvantaged populations. | Poverty increases significantly in this scenario, though there are pockets of development that to remain robust. |
| A low international priority for addressing environmental concerns leads to strong environmental degradation in some regions. |  |
| The combination of impeded development and limited environmental concern results in poor progress toward sustainability. | Progress towards meeting the SDGs is reversed across many indicators. |
| Population growth is low in industrialized and high in developing countries. | Population grows most rapidly in low income and low middle income economies and falls in high income economies. |
| Growing resource intensity and fossil fuel dependency along with difficulty in achieving international cooperation and slow technological change imply high challenges to mitigation. |  |
| The limited progress on human development, slow income growth, and lack of effective institutions, especially those that can act across regions, implies high challenges to adaptation for many groups in all regions. | Development is poor. |
| **SSP4** | **IFs Interpretation** |
| Highly unequal investments in human capital, combined with increasing disparities in economic opportunity and political power, lead to increasing inequalities and stratification both across and within countries. | Within country inequality (both of income and calories) increases as does cross-national inequality (in terms of development outcomes) |
| Over time, a gap widens between an internationally-connected society that is well educated and contributes to knowledge- and capital-intensive sectors of the global economy, and a fragmented collection of lower-income, poorly educated societies that work in a labor intensive, low tech economy. | Fertility rates in high income countries remain low while low income fertility remains high. Education, health and infrastructure outcomes in high income economies are high, while low income economies experience the inverse. |
| Power becomes more concentrated in a relatively small political and business elite, even in democratic societies, while vulnerable groups have little representation in national and global institutions. | Governance effectiveness erodes, and inequality grows within and across countries. |
| Economic growth is moderate in industrialized and middle-income countries, while low income countries lag behind, in many cases struggling to provide adequate access to water, sanitation and health care for the poor. | Infrastructure access in less developed countries struggles, while it remains relatively high in high income economies. |
| Social cohesion degrades and conflict and unrest become increasingly common. | The likelihood of intrastate conflict increases in this scenario significantly. |
| Technology development is high in the high-tech economy and sectors. | Technological development in high income economies continues with high income and upper middle income economies increasing ICT diffusion. |
| Uncertainty in the fossil fuel markets lead to underinvestment in new resources in many regions of the world. |  |
| Energy companies hedge against price fluctuations partly through diversifying their energy sources, with investments in both carbon-intensive fuels like coal and unconventional oil, but also low-carbon energy sources. |  |
| Environmental policies focus on local issues around middle and high income areas. |  |
| The combination of some development of low carbon supply options and expertise, and a well-integrated international political and business class capable of acting quickly and decisively, implies low challenges to mitigation. |  |
| Challenges to adaptation are high for the substantial proportions of populations at low levels of development and with limited access to effective institutions for coping with economic or environmental stresses. | The rich remain relatively well-off but giant pockets of persistent under development and conflict remain. |
| **SSP5** | **IFs Interpretation** |
| Driven by the economic success of industrialized and emerging economies, this world places increasing faith in competitive markets, innovation and participatory societies to produce rapid technological progress and development of human capital as the path to sustainable development. | The world is increasingly globalized –economic openness increases, productivity increases, taxes are cut. |
| Global markets are increasingly integrated, with interventions focused on maintaining competition and removing institutional barriers to the participation of disadvantaged population groups. | Formal economic activity grows relative to informal, and globalization rebounds. |
| There are also strong investments in health, education, and institutions to enhance human and social capital. | Government finance of education, health and infrastructure all increase. |
| At the same time, the push for economic and social development is coupled with the exploitation of abundant fossil fuel resources and the adoption of resource and energy intensive lifestyles around the world. |  |
| All these factors lead to rapid growth of the global economy. | The economy grows dramatically. |
| There is faith in the ability to effectively manage social and ecological systems, including by geo-engineering if necessary. |  |
| While local environmental impacts are addressed effectively by technological solutions, there is relatively little effort to avoid potential global environmental impacts due to a perceived tradeoff with progress on economic development. |  |
| Global population peaks and declines in the 21st century. | Yes |
| Though fertility declines rapidly in developing countries, fertility levels in high income countries are relatively high (at or above replacement level) due to optimistic economic outlooks. | Fertility rates decline more rapidly in low and low middle income economies and grow more rapidly in high income economies |
| International mobility is increased by gradually opening up labor markets as income disparities decrease. | Global migration is the highest in this scenario |
| The strong reliance on fossil fuels and the lack of global environmental concern result in potentially high challenges to mitigation. |  |
| The attainment of human development goals, robust economic growth, and highly engineered infrastructure results in relatively low challenges to adaptation to any potential climate change for all but a few. |  |

Table 2: IFs assumptions compared with literature

| ***TFP*** | ***IFs*** | ***Dellink*** |
| --- | --- | --- |
| *SSP1* | Medium | Medium |
| *SSP2* | Medium | Medium |
| *SSP3* | Low | Low |
| *SSP4* | Medium/High | Medium |
| *SSP5* | High | High |
|  | | |
| ***Convergence*** | ***IFs*** | ***Dellink*** |
| *SSP1* | High | High |
| *SSP2* | Medium | Medium |
| *SSP3* | Low | Low |
| *SSP4* | None | LI: Low; MI: Medium; LI: Low |
| *SSP5* | High | High |
|  | | |
| ***Openness*** | ***IFs*** | ***Dellink*** |
| *SSP1* | Medium | Medium |
| *SSP2* | Medium | Medium |
| *SSP3* | Low | Low |
| *SSP4* | Medium, Low for Low and Low Mid Income Countries | LI: Low; MI: Medium; HI: Medium |
| *SSP5* | High | High |
|  | | |
| ***Fertility*** | ***IFs*** | ***KC Lutz 2017*** |
| *SSP1* | Low | HF: Low; LF: Low; OECD: Medium |
| *SSP2* | Current Path | HF: Medium; LF: Medium; OECD: Medium |
| *SSP3* | High | HF: High; LF: High; OECD: Low |
| *SSP4* | HI: Low; LI: Hi | HF: High; LF: Low; OECD: Low |
| *SSP5* | LI: Low; HI: Hi | HF: Low; LF: Low; OECD: High |
|  | | |
| ***Mortality*** | ***IFs*** | ***KC Lutz 2017*** |
| *SSP1* | Low | HF: Low; LF: Low; OECD: Low |
| *SSP2* | Current Path | HF: Medium; LF: Medium; OECD: Medium |
| *SSP3* | All Mortality High | HF: High; LF: High; OECD: High |
| *SSP4* | HI: Low, LI: High | HF: High; LF: Medium; OECD: Medium |
| *SSP5* | Low | HF: Low; LF: Low; OECD; Low |
|  | | |
| ***Migration*** | ***IFs*** | ***KC Lutz 2017*** |
| *SSP1* | Slightly higher than Current Path | HF: Medium; LF: Medium; OECD: Medium |
| *SSP2* | Current Path | HF: Medium; LF: Medium; OECD: Medium |
| *SSP3* | Low | HF: Low; LF: Low; OECD: Low |
| *SSP4* | Similar to Current Path | HF: Medium; LF: Medium; OECD: Medium |
| *SSP5* | High | HF: High; LF: High; OECD: High |
|  | | |
| ***Education*** | ***IFs*** | ***KC Lutz 2017*** |
| *SSP1* | High | HF: High; LF: High; OECD: High |
| *SSP2* | Medium | HF: Medium; LF: Medium; OECD: Medium |
| *SSP3* | Low | HF: Low; LF: Low; OECD: Low |
| *SSP4* | Mixed | HF: CER-10%/GET; LF: CER-10%/GET; OECD: CER/CER-20% |
| *SSP5* | High | HF: High (FT-GET); LF: High (FT-GET); OECD: High (FT-GET) |
|  | | |
| ***Gini*** | ***IFs*** | ***Rao et al 2019*** |
| *SSP1* | Low | Low |
| *SSP2* | Medium | Medium |
| *SSP3* | Medium-High | Med-High |
| *SSP4* | High | High |
| *SSP5* | low | Low |
|  | | |
| ***Governance*** | ***IFs*** | ***Andrijevic et al 2019*** |
| *SSP1* | Medium | Effective |
| *SSP2* | Medium | Modestly effective |
| *SSP3* | Low | Ineffective |
| *SSP4* | HI: Medium; LI: Low | Unequal within countries |
| *SSP5* | High | Increasingly effective |
|  | | |
| ***Intrastate Conflict*** | ***IFs*** | ***Hegre*** |
| *SSP1* | Low | Low |
| *SSP2* | Medium | Medium-Low |
| *SSP3* | High | High |
| *SSP4* | Medium-High | Medium-High |
| *SSP5* | Low | Low |
|  | | |

Table 3: Scenario assumptions used in IFs.

|  | ***Parameter*** | ***Geography*** | ***Parameter Definition*** | ***Explanation*** | ***Description of Impact*** | ***Min*** | ***Max*** |
| --- | --- | --- | --- | --- | --- | --- | --- |
| *SSP1* | wmigrm | World | Multiplier on world migration rates. | SSP1 assumes higher migration. | Increases migration from 0.171% of global population to 0.177% by 2100. | 1.0167 | 1.5 |
| *SSP1* | labparm | High Income | A multiplier on labor participation rates. | SSP1 argues for increased leisure time. | Declines from 60.5% in 2025 to 28.1% in 2150. | 0.6687 | 1 |
| *SSP1* | mfpadd | High Income | An additive parameter changing multifactor productivity. | SSP1 argues for reduced emphasis on economic growth in high income economies. | Reduces to 0.005 by 2045, interpolated from a value of zero in 2025. This is maintained through 2150. | -0.005 | -0.0002 |
| *SSP1* | mfpadd | Low Income | An additive parameter changing multifactor productivity. | SSP1 argues for increased economic activity in less developed countries. | Increases to 0.014 by 2035 interpolated annually from a value of zero in 2025. Then declines to 0.0085 by 2056 interpolated from the 2035 value annually. This is maintained through 2150. | 0.005 | 0.015 |
| *SSP1* | mfpadd | Low Middle Income | An additive parameter changing multifactor productivity. | SSP1 argues for increased economic activity in less developed countries. | Increases to 0.014 by 2040 interpolated annually from a value of zero in 2025. Then it declines to 0.008 by 2060 interpolated annually from the 2040 value. This is maintained through 2150. | 0.005 | 0.014 |
| *SSP1* | aiddon | OECD | Multiplier on official development assistance. | SSP1 posits a more cooperative world. | This is a standard ODA target (0.7% of GDP). In this scenario, this intervention increases OECD ODA to 0.6% by 2100 due to other budgetary constraints in high income countries. | 0.224 | 0.7 |
| *SSP1* | labparm | Upper Middle Income | A multiplier on labor participation rates. | SSP1 argues for increased leisure time. | Declines from 64.3% in 2025 to 27.6% in 2150. | 0.7 | 1 |
| *SSP1* | mfpadd | Upper Middle Income | An additive parameter changing multifactor productivity. | SSP1 argues for increased economic activity in less developed countries. | Increases to 0.011 by 2040 interpolated from a value of zero in 2025. This is maintained through 2150. | 0.0012 | 0.011 |
| *SSP1* | aidsdratem | World | A multiplier on the death rate from AIDS. | SSP1 includes improved developmental outcomes. | This reduces AIDS deaths in SSP1 beyond other SSPs, though the death rate reduces across all scenarios. It is 0.00013% of population in 2050 with this intervention. | 0.5 | 1 |
| *SSP1* | climeconimpstk | World | When set to zero, this parameter does not impact the stock of capital when temperature change increases. | There are no climate impacts in the SSPs. | n/a | 0 | 0 |
| *SSP1* | climeconimpsw | World | This is the forward impact of climate change to downstream indicators in IFs. Zero turns it off. | There are no climate impacts in the SSPs. | n/a | 0 | 0 |
| *SSP1* | confforsw | World | This switch sets the forward impact of the government security index to productivity and inequality. | The SSPs include forward effects from civil war onset to socioecnomic development. | n/a | 2 | 2 |
| *SSP1* | edpriintnm | World | A multiplier on primary intake rates. | SSP1 includes improved developmental outcomes. | This intervention takes global intake in primary (net) to 100% before 2050. | 1.02 | 3 |
| *SSP1* | edprisurm | World | A multiplier on primary survival rates. | SSP1 includes improved developmental outcomes. | This pushes global primary survival to 100% by 2045 up from 92% in 2025. | 1.02 | 3 |
| *SSP1* | edseclowrgram | World | A multiplier on lower secondary graduation rates. | SSP1 includes improved developmental outcomes. | Graduation rates increase to 120% (gross--the current level in Demark) by 2070, up from 76% in 2025 . | 1.02 | 3 |
| *SSP1* | edseclowrtranm | World | A multiplier on lower secondary transition rates. | SSP1 includes improved developmental outcomes. | This increases transition to 100% by 2035 up from 95% in 2025. | 1.02 | 3 |
| *SSP1* | edsecupprgram | World | A multiplier on upper secondary graduation rates. | SSP1 includes improved developmental outcomes. | Graduation rates increase to 120% (gross) by 2085 up from 61% in 2025. | 1.02 | 3 |
| *SSP1* | edsecupprtranm | World | A multiplier on upper secondary transition rates. | SSP1 includes improved developmental outcomes. | This increases transition to 100% by 2050 up from 93% in 2025. | 1.02 | 3 |
| *SSP1* | edtergradm | World | A multiplier on tertiary graduation rates. | SSP1 includes improved developmental outcomes. | This increases transition to 79% by 2150 (highest tertiary graduation in 2025 is 70%) up from 29% in 2025. | 1.02 | 3 |
| *SSP1* | edterintm | World | A multiplier on tertiary intake rates. | SSP1 includes improved developmental outcomes. | Increases from 50% in 2025 to 100% in 2080. The highest rates in 2025 are 97% in Kazakhstan. | 1.02 | 3 |
| *SSP1* | envco2fert | World | A switch to turn off the effect of CO2 fertilization on crops. | There are no climate impacts in the SSPs. | n/a | 0 | 0 |
| *SSP1* | gdprext | World | A parameter to make GDP growth in IFs endogenous when set to -100. | Endogenous IFs behavior is the goal. | n/a | -100 | -100 |
| *SSP1* | gdsm | World | A multiplier on government spending. | SSP1 includes improved developmental outcomes. | This intervention increases global spending on health from 5.9% of GDP in 2025 to 8.1% by 2150. | 1 | 1.2 |
| *SSP1* | gdsm | World | A multiplier on government spending. | SSP1 includes improved developmental outcomes. | This increases global spending on R&D from 0.26% of GDP in 2025 to 0.28% in 2150. | 1 | 1.2 |
| *SSP1* | gdsm | World | A multiplier on government spending. | SSP1 includes improved developmental outcomes. | This decreases the share of global military spending from 2.3% of GDP in 2025 to 0.7% in 2150. | 0.432 | 0.9933 |
| *SSP1* | gdsm | World | A multiplier on government spending. | SSP1 includes improved developmental outcomes. | This intervention increases global spending on education from 4.8% of GDP in 2025 to 9.3% by 2150. | 1.0059 | 1.5482 |
| *SSP1* | gdsm | World | A multiplier on government spending. | SSP1 includes improved developmental outcomes. | This intervention decreases global spending on government administration from 3.3% of GDP in 2025 to 1.3% in 2150. | 0.5 | 0.9944 |
| *SSP1* | gdsm | World | A multiplier on government spending. | SSP1 includes improved developmental outcomes. | This maintains global spending on "core" infrastructure modeled in IFs at 1% of GDP. Infrastructure spending plus Infrastructure Other equal total spending in this area. | 1.0167 | 1.3 |
| *SSP1* | gdsm | World | A multiplier on government spending. | SSP1 includes improved developmental outcomes. | This increases infrastructure (non-core) spending from 2% of GDP in 2025 to 2.5% in 2150. | 1.0071 | 1.35 |
| *SSP1* | ginidomm | World | A multiplier on the Gini coefficient for income inequality. | SSP1 includes improved developmental outcomes. | This reduces the Gini coefficient for income inequality from 0.37 in 2025 to 0.21 in 2100, the level of the most equal countries in the world in 2025. | 0.5 | 0.9933 |
| *SSP1* | goveffectm | World | A multiplier on the level of government effectiveness. | SSP1 includes improved developmental outcomes. | This grows from an index value of 2.5 in 2025 to 5 in 2100. | 1 | 1.3 |
| *SSP1* | govhhtrnpenm | World | Cash transfers for pensions. | SSP1 includes improved developmental outcomes. | Pension transfers as a percent of GDP grow from 6 in 2025 to 11 by 2065. | 1 | 1.2 |
| *SSP1* | govhhtrnwelm | World | Cash transfers for welfare. | SSP1 includes improved developmental outcomes. | Welfare transfers as a percent of GDP grow from 15 in 2025 to 18 by 2065. | 1.0059 | 1.5241 |
| *SSP1* | govindsecurconflict | World | The contribution of civil war onset to forward linkages. | We are isolating the effect of civil war onset on forward linkages as this reflects the approaches taken by others. | n/a | 1 | 1 |
| *SSP1* | govindsecurgovrisk | World | The contribution of the governance risk index to forward impacts. | We are not focused on the effect of state fragility indices as a part of this project. | n/a | 0 | 0 |
| *SSP1* | govindsecurviolence | World | The contribution to societal violence to forward impacts. | We are not focused on levels of homicide or other societal violence as a part of this project. | n/a | 0 | 0 |
| *SSP1* | govrevm | World | A multiplier on government revenues. | SSP1 includes improved developmental outcomes. | Revenue grows from 31.5% of GDP in 2025 to 60% in 2150. | 1.0143 | 1.7 |
| *SSP1* | hivm | World | A multiplier on the HIV prevalence rate. | SSP1 includes improved developmental outcomes. | Increases HIV prevalence from 41 million in 2025 to 89 million in 2080, then reduces to 9.5 million by 2150. | 0.5 | 1 |
| *SSP1* | hlbmim | World | A multiplier on the body mass index. | SSP1 includes improved developmental outcomes. | Decreases the BMI from 25.2 in 2025 to 24 in 2100. | 0.5312 | 1 |
| *SSP1* | hlmortm | World | A multiplier on cancer mortality. | SSP1 includes improved developmental outcomes. | Increases mortality from 1.4 deaths per thousand in 2025 to 2.4 in 2150. | 0.2 | 0.99 |
| *SSP1* | hlmortm | World | A multiplier on heart disease mortality. | SSP1 includes improved developmental outcomes. | Decreases mortality from 2.6 deaths per thousand in 2025 to 2.2 in 2150. | 0.2 | 0.9927 |
| *SSP1* | hlmortm | World | A multiplier on other non-communicable disease mortality | SSP1 includes improved developmental outcomes. | Decreases mortality from 0.4 deaths per thousand in 2025 to 0.2 in 2150. | 0.2 | 0.99 |
| *SSP1* | hlmortm | World | A multiplier on respiratory non communicable disease mortality. | SSP1 includes improved developmental outcomes. | Increases mortality from 0.6 deaths per thousand in 2025 to 3.8 in 2150. | 0.2 | 0.992 |
| *SSP1* | hlmortm | World | A multiplier on non-communicable digestive mortality. | SSP1 includes improved developmental outcomes. | Increases mortality from 0.4 deaths per thousand in 2025 to 2.1 in 2150. | 0.2 | 0.992 |
| *SSP1* | hlmortm | World | A multiplier on traffic accident mortality. | SSP1 includes improved developmental outcomes. | Increases mortality from 0.2 deaths per thousand in 2025 to 0.25 in 2150. | 0.2 | 0.992 |
| *SSP1* | hlmortm | World | A multiplier on intentional injury mortality. | SSP1 includes improved developmental outcomes. | Increases mortality from 0.2 deaths per thousand in 2025 to 0.3 in 2150. | 0.2 | 0.9933 |
| *SSP1* | hlmortm | World | A multiplier on unintentional injury mortality. | SSP1 includes improved developmental outcomes. | Increases mortality from 0.38 deaths per thousand in 2025 to 2.4 in 2150. | 0.2 | 1 |
| *SSP1* | hlmortm | World | A multiplier on other communicable disease mortality. | SSP1 includes improved developmental outcomes. | Decreases mortality from 0.6 deaths per thousand in 2025 to 0.1 in 2150. | 0.33 | 0.9916 |
| *SSP1* | hlmortm | World | A multiplier on psychoneurological disease mortality. | SSP1 includes improved developmental outcomes. | Increases mortality from 0.4 deaths per thousand in 2025 to 2.7 in 2150. | 0.2 | 0.99 |
| *SSP1* | hlmortm | World | A multiplier on diabetes mortality. | SSP1 includes improved developmental outcomes. | Increases mortality from 0.2 deaths per thousand in 2025 to 1.2 in 2150. | 0.3 | 0.9912 |
| *SSP1* | hlmortm | World | A multiplier on AIDS mortality. | SSP1 includes improved developmental outcomes. | Decreases mortality from 0.2 deaths per thousand in 2025 to 0 in 2150. | 0.3 | 0.976 |
| *SSP1* | hlmortm | World | A multiplier on diarrheal disease mortality. | SSP1 includes improved developmental outcomes. | Maintains mortality at 0.2 across time. | 0.15 | 0.984 |
| *SSP1* | hlmortm | World | A multiplier on malaria mortality. | SSP1 includes improved developmental outcomes. | Decreases mortality from 0.1 deaths per thousand in 2025 to 0 in 2150. | 0.3 | 0.9844 |
| *SSP1* | hlmortm | World | A multiplier on respiratory infection mortality. | SSP1 includes improved developmental outcomes. | Increases mortality from 0.3 deaths per thousand in 2025 to 0.8 in 2150. | 0.4 | 0.9829 |
| *SSP1* | infraelecaccm | World | A multiplier on electricity access rates. | SSP1 includes improved developmental outcomes. | Increases electricity access rates from 91.5% in 2025 to 100% by 2070. | 1 | 1.2 |
| *SSP1* | sanitationm | World | A multiplier on the share of the population using unimproved sanitation. | SSP1 includes improved developmental outcomes. | Access to improved sanitation grows from 87% in 2025 to 100% in 2055. | 0.1 | 1 |
| *SSP1* | sfintlwaradd | World | An additive parameter that exogenously changes the probability of civil war onset. | The world is more conflict prone. | Probability of conflict reduces from 13.3% in 2025 to 0.6% by 2075. | -0.75 | 0 |
| *SSP1* | tfrm | World | A multiplier on the total fertility rate. | SSP1 includes improved developmental outcomes. | Total fertility rate declines from 2.2 in 2025 to 1.1 in 2050. | 0.5 | 1 |
| *SSP1* | tfrmin | World | A parameter setting the convergence level of the total fertility rate. | SSP1 includes improved developmental outcomes. | n/a | 0.92 | 1.42 |
| *SSP5* | tfrmin | World | A parameter setting the convergence level of the total fertility rate. | SSP1 includes improved developmental outcomes. | n/a | 0.92 | 1.42 |
| *SSP1* | watsafefwdsw | World | A switch turning on the forward impact of water and sanitation to development. |  | n/a | 0 | 0 |
| *SSP1* | watsafem | World | A multiplier on the share of the population using unimproved water. | SSP1 includes improved developmental outcomes. | Improved access grows from 94% in 2025 to 100% by 2055. | 0.1 | 1 |
| *SSP2* | climeconimpstk | World | When set to zero, this parameter does not impact the stock of capital when temperature change increases. | There are no climate impacts in the SSPs. | n/a | 0 | 0 |
| *SSP2* | climeconimpsw | World | This is the forward impact of climate change on downstream indicators in IFs. Zero turns it off. | There are no climate impacts in the SSPs. | n/a | 0 | 0 |
| *SSP2* | confforsw | World | This switch sets the forward impact of the government security index to productivity and inequality. | The SSPs include forward effects from civil war onset to socioecnomic development. | n/a | 2 | 2 |
| *SSP2* | envco2fert | World | A switch to turn off the effect of CO2 fertilization on crops. | There are no climate impacts in the SSPs. | n/a | 0 | 0 |
| *SSP2* | gdprext | World | A parameter to make GDP growth in IFs endogenous when set to -100. | Endogenous IFs behavior is the goal. | n/a | -100 | -100 |
| *SSP2* | ginidomm | World | A multiplier on the Gini coefficient for income inequality. | This adjusts the IFs Current Path so that inequality does not improve which is the endogenous behavior. | The world becomes slightly less equal, increasing the Gini coefficient for income from 0.37 in 2025 to 0.41 in 2150. | 1 | 1.1908 |
| *SSP2* | govindsecurconflict | World | The contribution of civil war onset to forward linkages. | We are isolating the effect of civil war onset on forward linkages as this reflects the approaches taken by others. | n/a | 1 | 1 |
| *SSP2* | govindsecurgovrisk | World | The contribution of the governance risk index to forward impacts. | We are not focused on the effect of state fragility indices as a part of this project. | n/a | 0 | 0 |
| *SSP2* | govindsecurviolence | World | The contribution to societal violence to forward impacts. | We are not focused on levels of homicide or other societal violence as a part of this project. | n/a | 0 | 0 |
| *SSP2* | tfrmin | World | A parameter setting the convergence level of the total fertility rate. | SSP4 shows improved outcomes for more developed countries. | n/a | 1.7 | 1.7 |
| *SSP2* | watsafefwdsw | World | A switch turning on the forward impact of water and sanitation to development. |  | n/a | 0 | 0 |
| *SSP3* | tfrm | High Income | A multiplier on the total fertility rate. | SSP3 shows reduced population growth in high income economies based on the work of KC and Lutz. | Grows from 1.5 in 2025 to 2 in 2115 and maintains that value to 2150. | 0.5 | 1 |
| *SSP3* | tfrm | Low Income | A multiplier on the total fertility rate. | SSP3 shows worsening development. | Reduces from 4.5 in 2025 to 3 in 2090. | 1 | 1.5 |
| *SSP3* | tfrm | Low Middle Income | A multiplier on the total fertility rate. | SSP3 shows worsening development. | Stays at 2.6 the entire time horizon. | 1 | 1.3 |
| *SSP3* | tfrm | Upper Middle Income | A multiplier on the total fertility rate. | SSP3 shows worsening development. | Grows from 1.5 in 2025 to 2.5 in 2120. | 1 | 1.25 |
| *SSP3* | aidsdratem | World | Multiplier on the death rate from AIDS. | SSP3 shows worsening development. | This keeps the SSP3 death rate from AIDS highest, though the overall rate still drops. It is 0.0006% in 2050 with this intervention. | 1 | 1.5 |
| *SSP3* | climeconimpstk | World | When set to zero, this parameter does not impact the stock of capital when temperature change increases. | There are no climate impacts in the SSPs. | n/a | 0 | 0 |
| *SSP3* | climeconimpsw | World | This is the forward impact of climate change on downstream indicators in IFs. Zero turns it off. | There are no climate impacts in the SSPs. | n/a | 0 | 0 |
| *SSP3* | clpccvm | World | A parameter that changes the distribution of calories in a society. | SSP3 shows worsening development. | This increases the coefficient of variation to 0.37 by the end of the century, which is the 96th percentile of countries currently. | 1 | 1.5 |
| *SSP3* | confforsw | World | This switch sets the forward impact of the government security index to productivity and inequality. | The SSPs include forward effects from civil war onset to socioecnomic development. | n/a | 2 | 2 |
| *SSP3* | edpriintnm | World | A multiplier on primary intake rates. | SSP3 shows worsening development. | This reduces net primary intake to 89.9% by 2050, similar to countries in the 83rd percentile today. | 0.9 | 1 |
| *SSP3* | edprisurm | World | A multiplier on primary survival rates. | SSP3 shows worsening development. | This pushes global primary survival to 76% by 2050, similar to countries in the 82nd percentile today. | 0.8 | 1 |
| *SSP3* | edseclowrgram | World | A multiplier on lower secondary graduation rates. | SSP3 shows worsening development. | Graduation rates reduce to 62% by 2060 (the 70th percentile in 2025) from 76% in 2025. | 0.8 | 1 |
| *SSP3* | edseclowrtranm | World | A multiplier on lower secondary transition rates. | SSP3 shows worsening development. | This reduces transition to 78% by 2050 (the 97th percentile in 2025), down from 95% in 2025. | 0.8 | 1 |
| *SSP3* | edsecupprgram | World | A multiplier on upper secondary graduation rates. | SSP3 shows worsening development. | Graduation rates reduce to 46% by 2065 (the 65th percentile in 2025) from 61% in 2025. | 0.8 | 1 |
| *SSP3* | edsecupprtranm | World | A multiplier on upper secondary transition rates. | SSP3 shows worsening development. | This reduces transition to 76% by 2050, down from 93% in 2025. | 0.8 | 1 |
| *SSP3* | edtergradm | World | A multiplier on tertiary graduation rates. | SSP3 shows worsening development. | Graduation rates reduce to 27% by 2050 (the 61st percentile in 2025) from 29% in 2025. | 0.8 | 1 |
| *SSP3* | edterintm | World | A multiplier on tertiary intake rates. | SSP3 shows worsening development. | Decreases from 50% in 2025 to 42% in 2060. This is the 60th percentile in 2025. | 0.8 | 1 |
| *SSP3* | envco2fert | World | A switch to turn off the effect of CO2 fertilization on crops. | There are no climate impacts in the SSPs. | n/a | 0 | 0 |
| *SSP3* | gdprext | World | A parameter to make GDP growth in IFs endogenous when set to -100. | Endogenous IFs behavior is the goal. | n/a | -100 | -100 |
| *SSP3* | gdsm | World | A multiplier on government spending. | SSP3 shows heightened concerns about conflict. | This intervention increases global military spending from 2.3% of GDP in 2025 to 2.5% in 2150. | 1 | 1.5 |
| *SSP3* | gdsm | World | A multiplier on government spending. | SSP3 shows worsening development. | This intervention decreases global spending on R&D from 0.26% of GDP in 2025 to 1.5% in 2150. | 0.6 | 1 |
| *SSP3* | gdsm | World | A multiplier on government spending. | SSP3 shows worsening development. | This intervention decreases global spending on "core" infrastructure from 1.4% of GDP in 2025 to 0.8% of GDP in 2150. | 0.6 | 1 |
| *SSP3* | gdsm | World | A multiplier on government spending. | SSP3 shows worsening development and this category essentially wastes money. | This intervention maintains global spending on administration at 3% of GDP. | 1 | 1.5 |
| *SSP3* | ginidomm | World | A multiplier on the Gini coefficient for income inequality. | Inequality increases in SSP3. | This increases the Gini coefficient for income inequality from 0.37 in 2025 to 0.59 in 2150, similar to the levels of the most unequal countries in 2025. | 1 | 1.4771 |
| *SSP3* | goveffectm | World | A multiplier on the level of government effectiveness. | SSP3 shows worsening development. | This grows from an index value of 2.4 in 2025 to 3.1 in 2150. | 0.8 | 1 |
| *SSP3* | govindsecurconflict | World | The contribution of civil war onset to forward linkages. | We are isolating the effect of civil war onset on forward linkages as this reflects the approaches taken by others. | n/a | 1 | 1 |
| *SSP3* | govindsecurgovrisk | World | The contribution of the governance risk index to forward impacts. | We are not focused on the effect of state fragility indices as a part of this project. | n/a | 0 | 0 |
| *SSP3* | govindsecurviolence | World | The contribution to societal violence to forward impacts. | We are not focused on levels of homicide or other societal violence as a part of this project. | n/a | 0 | 0 |
| *SSP3* | hivm | World | A multiplier on the HIV prevalence rate. | SSP3 shows worsening development. | Increases HIV prevalence from 41 million in 2025 to 105 million in 2075, then reduces to 85 million by 2150. | 1 | 2 |
| *SSP3* | hlbmim | World | A multiplier on the body mass index. | SSP3 shows worsening development. | Increases the BMI from 25.2 in 2025 to 38 in 2085. | 1 | 1.5 |
| *SSP3* | hlmortm | World | A multiplier on all mortality types. | SSP3 shows worsening development. | Increases total average mortality from 7.8 deaths per thousand in 2025 to 13.1 in 2075, then declines to 10.5 in 2150. | 1.01 | 2.2 |
| *SSP3* | neonatmorm | World | A multiplier on neonatal mortality | SSP3 shows worsening development. | Decreases neonatal mortality from 18.1 per thousand live births in 2025 to 11.3 by 2150. | 1.01 | 1.652 |
| *SSP3* | sanitationm | World | A multiplier on the share of the population using unimproved sanitation. | SSP3 shows worsening development. | Access to improved sanitation grows from 87% in 2025 to 93% in 2150. | 1 | 1.5 |
| *SSP3* | sfintlwaradd | World | An additive parameter that exogenously changes the probability of civil war onset. | The world is more conflict prone. | Probability of conflict increases from 13.3% in 2025 to 27.6% by 2075. Historically, some regions have seen similar or larger increases in conflict magnitude including SE Asia (from 28% conflict likelihood in 1962 to 63% in 1970), North Africa (14% in 2009 to 43% in 2011), and South Asia (from 33% in 1982 to 66% in 1983). Globally, the largest historical increase was from 5% in 1960 to 23% in 1992. | 0 | 0.15 |
| *SSP3* | tfrmin | World | A parameter setting the convergence level of the total fertility rate. | SSP3 shows worsening development and higher fertility rates especially in the less developed world will be an additional challenge. | n/a | 2 | 2 |
| *SSP3* | watsafefwdsw | World | A switch turning on the forward impact of water and sanitation to development. |  | n/a | 0 | 0 |
| *SSP3* | watsafem | World | A multiplier on the share of the population using unimproved water. | SSP4 shows worse developmental outcomes in less developed countries. | Improved access declines from 94% in 2025 to 93% in 2090, then increases to 96% by 2150. | 1 | 1.5 |
| *SSP3* | wmigrm | World | Multiplier on world migration rates. | World migration reduces in SSP3. | Decreases migration from 0.17% of global population to 0.015% by 2040. | 0.1 | 1 |
| *SSP3* | xshift | World | A shift in the openness of global trade. | SSP3 shows worsening economic integration. | Reduces global imports as a percent of GDP from 28% in 2025 to 27% by 2150. | -0.05 | 0 |
| *SSP4* | edpriintnm | High Income | A multiplier on primary intake rates. | SSP4 shows good educational outcomes in more developed countries. | This pushes high income countries to 100% before 2030. | 1 | 1.2 |
| *SSP4* | edprisurm | High Income | A multiplier on primary survival rates. | SSP4 shows good educational outcomes in more developed countries. | This pushes high income countries to 100% by 2035 up from 99.5% in 2025. | 1 | 1.2 |
| *SSP4* | edseclowrgram (male) | High Income | A multiplier on lower secondary graduation rates. | SSP4 shows good educational outcomes in more developed countries. | Graduation rates increase to 110% (gross--the current level in Demark) by 2040 up from 99% in 2025. | 1 | 1.2 |
| *SSP4* | edseclowrtranm (male) | High Income | A multiplier on lower secondary transition rates. | SSP4 shows good educational outcomes in more developed countries. | This increases transition to 100% by 2030 up from 99% in 2025. | 1 | 1.2 |
| *SSP4* | edsecupprgram (male) | High Income | A multiplier on upper secondary graduation rates. | SSP4 shows good educational outcomes in more developed countries. | Graduation rates increase to 110% (gross) by 2065 up from 91% in 2025. | 1 | 1.2 |
| *SSP4* | edsecupprtranm (male) | High Income | A multiplier on upper secondary transition rates. | SSP4 shows good educational outcomes in more developed countries. | This increases transition to 100% by 2035 up from 98% in 2025. | 1 | 1.2 |
| *SSP4* | edtergradm (male) | High Income | A multiplier on tertiary graduation rates. | SSP4 shows good educational outcomes in more developed countries. | Graduation rates increase to 62% by 2040 up from 52% in 2025. | 1 | 1.4 |
| *SSP4* | edterintm (male) | High Income | A multiplier on tertiary intake rates. | SSP4 shows good educational outcomes in more developed countries. | Increases from 74% in 2025 to 90% in 2040. | 1 | 1.4 |
| *SSP4* | gdsm | High Income | A multiplier on government spending. | SSP4 shows good educational outcomes in more developed countries. | This increases education spending from 4.8% of GDP in 2025 to 6% by 2080. | 1 | 1.5 |
| *SSP4* | gdsm | High Income | A multiplier on government spending. | SSP4 shows good outcomes in more developed countries. | In spite of this intervention, infrastructure spending (on core categories) reduces from 1.4% in 2025 to 0.7% by 2150 (this does not factor in the "infrastructure other" spending). | 1 | 1.25 |
| *SSP4* | hlmortm | High Income | A multiplier on cancer mortality. | SSP4 shows good health outcomes in developed countries. | Increases mortality from 1.4 deaths per thousand in 2025 to 1.8 by 2070, then declines to 1.5 in 2150. | 0.5 | 1 |
| *SSP4* | hlmortm | High Income | A multiplier on heart disease mortality. | SSP4 shows good health outcomes in developed countries. | Decreases mortality from 2.6 deaths per thousand in 2025 to 3 in 2050, then declines to 2.2 by 2150. | 0.5 | 1 |
| *SSP4* | hlmortm | High Income | A multiplier on digestive disease mortality. | SSP4 shows good health outcomes in developed countries. | Increases mortality from 0.4 deaths per thousand in 2025 to 1.1 in 2150. | 0.5 | 1 |
| *SSP4* | hlmortm | High Income | A multiplier on respiratory non-communicable disease mortality. | SSP4 shows good health outcomes in developed countries. | Increases mortality from 0.6 deaths per thousand in 2025 to 1.7 in 2150. | 0.5 | 1 |
| *SSP4* | hlmortm | High Income | A multiplier on other non-communicable disease mortality. | SSP4 shows good health outcomes in developed countries. | Remains flat at 0.4 deaths per thousand. | 0.5 | 1 |
| *SSP4* | ictbroadm | High Income | A multiplier on broadband internet access. | SSP4 shows good outcomes in developed countries. | Saturates broadband access by 2050. | 1 | 1.25 |
| *SSP4* | mfpadd | High Income | An additive parameter changing multifactor productivity. | SSP4 shows increased inequality and divergence across income groups with improved outcomes in more developed countries. | Increases to 0.01 by 2035 interpolated from a value of zero in 2025. Then increases again to 0.015 by 2085 interpolated from the 2035 value. This is maintained though 2150. | 0 | 0.015 |
| *SSP4* | clpccvm | Low Income | A parameter that changes the distribution of calories in a society. | SSP4 shows increases in inequality and worsening development outcomes in less developed countries. | This increases the coefficient of variation to 0.38 by the end of the century which is the 98th percentile of countries currently. | 1 | 1.3 |
| *SSP4* | edpriintnm (female) | Low Income | A multiplier on primary intake rates. | SSP4 shows poor educational outcomes in less developed countries. | This reduces female net primary intake to 83% by the late 2030s or the 88th percentile of countries today. | 0.9 | 1 |
| *SSP4* | edtergradm (female) | Low Income | A multiplier on tertiary graduation rates. | SSP4 shows poor educational outcomes in less developed countries. | Graduation rates increase to 10% by 2150 up from 3% in 2025. | 0.8 | 1 |
| *SSP4* | edterintm (female) | Low Income | A multiplier on tertiary intake rates. | SSP4 shows poor educational outcomes in less developed countries. | Female intake rates remain flat at 15% through 2045 while male intake rates increase from 17% to 19%. | 0.8 | 1 |
| *SSP4* | gdsm | Low Income | A multiplier on government spending. | SSP4 shows heightened concerns about conflict. | This maintains low income spending on the military at 3% of GDP. | 1 | 1.75 |
| *SSP4* | gdsm | Low Income | A multiplier on government spending. | SSP4 shows poor educational outcomes in less developed countries. | This intervention reduces education spending from 4% of GDP in 2025 to 2.7% by 2150. | 0.6 | 1 |
| *SSP4* | goveffectm | Low Income | A multiplier on the level of government effectiveness. | SSP4 shows poor outcomes in less developed countries. | This grows from an index value of 1.3 in 2025 to 2.2 in 2150. | 0.75 | 1 |
| *SSP4* | mfpadd | Low Income | An additive parameter changing multifactor productivity. | SSP4 shows increased inequality and divergence across income groups with worse outcomes in less developed countries. | Declines to -0.015 by 2035 interpolated from a value of zero in 2025. Then declines further to -0.02 by 2085 interpolated from the 2035 value. This is maintained through 2150. | -0.02 | 0 |
| *SSP4* | sanitationm | Low Income | A multiplier on the share of the population using unimproved sanitation. | SSP4 shows worse developmental outcomes in less developed countries. | Access to improved sanitation grows from 48% in 2025 to 80% in 2150. | 1 | 1.3 |
| *SSP4* | tfrm | Low Income | A multiplier on the total fertility rate. | SSP4 shows worse developmental outcomes in less developed countries. | Declines from 4.5 in 2025 to 2.3 by 2150. | 1 | 1.5 |
| *SSP4* | watsafem | Low Income | A multiplier on the share of the population using unimproved water. | SSP4 shows worse developmental outcomes in less developed countries. | Improved access grows from 79% in 2025 to 86% by 2150. | 1 | 1.3 |
| *SSP4* | xshift | Low Income | A shift in the openness of trade. | SSP4 shows worse developmental outcomes in less developed countries. | Trade increases from 36% of GDP in 2025 to 54% in 2150 in spite of this intervention. | -0.025 | 0 |
| *SSP4* | clpccvm | Low Middle Income | A parameter that changes the distribution of calories in a society. | SSP4 shows increases in inequality and worsening development outcomes in less developed countries. | This increases the coefficient of variation to 0.28 by the end of the century which is the 63rd percentile of countries currently. | 1 | 1.2 |
| *SSP4* | edtergradm (female) | Low Middle Income | A multiplier on tertiary graduation rates. | SSP4 shows poor educational outcomes in less developed countries. | Graduation rates increase to 21% by 2150 up from 10% in 2025. | 0.8 | 1 |
| *SSP4* | edterintm (female) | Low Middle Income | A multiplier on tertiary intake rates. | SSP4 shows poor educational outcomes in less developed countries. | Female intakes remain flat at 39% from 2025-2045 while male intake rates grow from 39% to 45%. | 0.8 | 1 |
| *SSP4* | gdsm | Low Middle Income | A multiplier on government spending. | SSP4 shows heightened concerns about conflict. | Increases spending on the military from 2.4% of GDP in 2025 to 3.3% in 2150. | 1 | 1.5 |
| *SSP4* | gdsm | Low Middle Income | A multiplier on government spending. | SSP4 shows poor educational outcomes in less developed countries. | Education spending as a share of GDP increases from 4% of GDP in 2025 to 2.7% by 2150. | 0.6 | 1 |
| *SSP4* | goveffectm | Low Middle Income | A multiplier on the level of government effectiveness. | SSP4 shows poor outcomes in less developed countries. | This grows from an index value of 2 in 2025 to 2.9 in 2150. | 0.75 | 1 |
| *SSP4* | mfpadd | Low Middle Income | An additive parameter changing multifactor productivity. | SSP4 shows increased inequality and divergence across income groups with worse outcomes in less developed countries. | Declines to -0.01 by 2085 interpolated annually from a value of zero in 2025. This is maintained through 2150. | -0.01 | 0 |
| *SSP4* | sanitationm | Low Middle Income | A multiplier on the share of the population using unimproved sanitation. | SSP4 shows worse developmental outcomes in less developed countries. | Access to improved sanitation grows from 83% in 2025 to 94% in 2150. | 1 | 1.2 |
| *SSP4* | tfrm | Low Middle Income | A multiplier on the total fertility rate. | SSP4 shows worse developmental outcomes in less developed countries. | Declines from 2.5 in 2025 to 1.8 by 2150. | 1 | 1.3 |
| *SSP4* | watsafem | Low Middle Income | A multiplier on the share of the population using unimproved water. | SSP4 shows worse developmental outcomes in less developed countries. | Improved access grows from 94% in 2025 to 97% by 2150. | 1 | 1.2 |
| *SSP4* | edpriintnm (male)_ | Upper Middle Income | A multiplier on primary intake rates. | SSP4 shows good educational outcomes in more developed countries. | This pushes upper middle income countries to 100% before 2030. | 1 | 1.2 |
| *SSP4* | edprisurm (male) | Upper Middle Income | A multiplier on primary survival rates. | SSP4 shows good educational outcomes in more developed countries. | This pushes upper middle income countries to 100% by 2040 up from 95% in 2025. | 1 | 1.2 |
| *SSP4* | edseclowrgram (male) | Upper Middle Income | A multiplier on lower secondary graduation rates. | SSP4 shows good educational outcomes in more developed countries. | Graduation rates increase to 107% (gross--the current level in Demark) by 2060 up from 91% in 2025. | 1 | 1.2 |
| *SSP4* | edseclowrtranm (male) | Upper Middle Income | A multiplier on lower secondary transition rates. | SSP4 shows good educational outcomes in more developed countries. | This increases transition to 99% by 2050 up from 93% in 2025. | 1 | 1.2 |
| *SSP4* | edsecupprgram (male) | Upper Middle Income | A multiplier on upper secondary graduation rates. | SSP4 shows good educational outcomes in more developed countries. | Graduation rates increase to 108% (gross) by 2150 up from 73% in 2025. | 1 | 1.2 |
| *SSP4* | edsecupprtranm (male) | Upper Middle Income | A multiplier on upper secondary transition rates. | SSP4 shows good educational outcomes in more developed countries. | This increases transition to 99% by 2050 up from 93% in 2025. | 1 | 1.2 |
| *SSP4* | edtergradm (male) | Upper Middle Income | A multiplier on tertiary graduation rates. | SSP4 shows good educational outcomes in more developed countries. | Graduation rates increase to 42% by 2040 up from 34% in 2025. | 1 | 1.4 |
| *SSP4* | edterintm (male) | Upper Middle Income | A multiplier on tertiary intake rates. | SSP4 shows good educational outcomes in more developed countries. | Increases from 62% in 2025 to 74% in 2040. | 1 | 1.4 |
| *SSP4* | gdsm | Upper Middle Income | A multiplier on government spending. | SSP4 shows heightened concerns about conflict. | This increases military spending as a share of GDP from 1.9% in 2025 to 2.4% by 2100. | 1 | 1.5 |
| *SSP4* | ictbroadm | Upper Middle Income | A multiplier on broadband internet access. | SSP4 shows good outcomes in developed countries. | Saturates broadband access by 2060. | 1 | 1.2 |
| *SSP4* | xshift | Low Middle Income | A shift in the openness of trade. | SSP4 shows worse developmental outcomes in less developed countries. | Trade increases from 29.6% of GDP in 2025 to 36.7% in 2150 in spite of this intervention. | -0.025 | 0 |
| *SSP4* | climeconimpstk | World | When set to zero, this parameter does not impact the stock of capital when temperature change increases. | There are no climate impacts in the SSPs. | n/a | 0 | 0 |
| *SSP4* | climeconimpsw | World | This is the forward impact of climate change to downstream indicators in IFs. Zero turns it off. | There are no climate impacts in the SSPs. | n/a | 0 | 0 |
| *SSP4* | confforsw | World | This switch sets the forward impact of the government security index to productivity and inequality. | The SSPs include forward effects from civil war onset to socioecnomic development. | n/a | 2 | 2 |
| *SSP4* | envco2fert | World | A switch to turn off the effect of CO2 fertilization on crops. | There are no climate impacts in the SSPs. | n/a | 0 | 0 |
| *SSP4* | gdprext | World | A parameter to make GDP growth in IFs endogenous when set to -100. | Endogenous IFs behavior is the goal. | n/a | -100 | -100 |
| *SSP4* | ginidomm | World | A multiplier on the Gini coefficient for income inequality. | The world becomes increasingly unequal within and across countries. | This increases the Gini coefficient for income inequality from 0.37 in 2025 to 0.59 in 2150 similar to the levels of the most unequal countries in 2025. | 1 | 1.6202 |
| *SSP4* | govindsecurconflict | World | The contribution of civil war onset to forward linkages. | We are isolating the effect of civil war onset on forward linkages as this reflects the approaches taken by others. | n/a | 1 | 1 |
| *SSP4* | govindsecurgovrisk | World | The contribution of the governance risk index to forward impacts. | We are not focused on the effect of state fragility indices as a part of this project. | n/a | 0 | 0 |
| *SSP4* | govindsecurviolence | World | The contribution to societal violence to forward impacts. | We are not focused on levels of homicide or other societal violence as a part of this project. | n/a | 0 | 0 |
| *SSP4* | hlmortm | World | A multiplier on other communicable disease mortality. | SSP4 shows poor health outcomes in less developed countries. | Decreases mortality from 0.6 deaths per thousand in 2025 to 0.2 in 2150. | 1 | 1.5 |
| *SSP4* | hlmortm | World | A multiplier on diarrheal disease mortality. | SSP4 shows poor health outcomes in less developed countries. | Increases total average mortality from 0.2 deaths per thousand in 2025 to 0.4 in 2085, then declines to 0.2 in 2150. | 1 | 1.5 |
| *SSP4* | hlmortm | World | A multiplier on malaria mortality. | SSP4 shows poor health outcomes in less developed countries. | Increases total average mortality from 0.1 deaths per thousand in 2025 to 0.3 in 2085, then declines to 0.2 in 2150. | 1 | 1.5 |
| *SSP4* | hlmortm | World | A multiplier on respiratory infection mortality. | SSP4 shows poor health outcomes in less developed countries. | Increases total average mortality from 0.3 deaths per thousand in 2025 to 0.45 in 2085, then declines to 0.3 in 2150. | 1 | 1.5 |
| *SSP4* | sfintlwaradd | World | An additive parameter that exogenously changes the probability of civil war onset. | The world is more conflict prone. | Probability of conflict reduces from 13.3% in 2025 to 20.2% by 2075. Historically, some regions have seen similar or larger increases in conflict magnitude including SE Asia (from 28% conflict likelihood in 1962 to 63% in 1970), North Africa (14% in 2009 to 43% in 2011), and South Asia (from 33% in 1982 to 66% in 1983). Globally, the largest historical increase was from 5% in 1960 to 23% in 1992. | 0 | 0.1 |
| *SSP4* | tfrmin | World | A parameter setting the convergence level of the total fertility rate. | SSP4 shows improved outcomes for more developed countries and lower fertility rates provide more resources for spending. | n/a | 0.908 | 1.408 |
| *SSP4* | watsafefwdsw | World | A switch turning on the forward impact of water and sanitation to development. |  | n/a | 0 | 0 |
| *SSP5* | tfrm | High Income | A multiplier on the total fertility rate. | SSP5 includes a strong explicit increase in fertility in high income countries. | Grows from 1.5 in 2025 to 2.1 by 2150. | 1.01 | 1.65 |
| *SSP5* | tfrm | Low Income | A multiplier on the total fertility rate. | SSP5 includes a strong explicit reduction in fertility in low income countries. | Fertility rates reduce to 1.2 by 2055 from a starting point of 4.5 in 2025. | 0.5 | 1 |
| *SSP5* | tfrm | Low Middle Income | A multiplier on the total fertility rate. | SSP5 includes a strong explicit reduction in fertility in low income countries. | Fertility rates reduce to 1.1 by 2055 from a starting point of 2.5 in 2025. | 0.5 | 1 |
| *SSP5* | tfrm | Upper Middle Income | A multiplier on the total fertility rate. | SSP5 includes a strong explicit reduction in fertility in low income countries. | Fertility rates reduce from 1.5 in 2025 to 1.4 by 2150. | 0.5 | 1 |
| *SSP5* | climeconimpstk | World | When set to zero, this parameter does not impact the stock of capital when temperature change increases. | There are no climate impacts in the SSPs. | n/a | 0 | 0 |
| *SSP5* | climeconimpsw | World | This is the forward impact of climate change to downstream indicators in IFs. Zero turns it off. | There are no climate impacts in the SSPs. | n/a | 0 | 0 |
| *SSP5* | confforsw | World | This switch sets the forward impact of the government security index to productivity and inequality. | The SSPs include forward effects from civil war onset to socioecnomic development. | n/a | 2 | 2 |
| *SSP5* | edpriintnm | World | A multiplier on primary intake rates. | SSP5 includes strong investments in education. | This pushes high income countries to 100% before 2030. | 1.02 | 3 |
| *SSP5* | edprisurm | World | A multiplier on primary survival rates. | SSP5 includes strong investments in education. | This pushes global primary survival to 100% by 2045 up from 92% in 2025. | 1.02 | 3 |
| *SSP5* | edseclowrgram | World | A multiplier on lower secondary graduation rates. | SSP5 includes strong investments in education. | Graduation rates increase to 120% (gross--the current level in Demark) by 2070 up from 76% in 2025 . | 1.02 | 3 |
| *SSP5* | edseclowrtranm | World | A multiplier on lower secondary transition rates. | SSP5 includes strong investments in education. | This increases transition to 100% by 2035 up from 95% in 2025. | 1.02 | 3 |
| *SSP5* | edsecupprgram | World | A multiplier on upper secondary graduation rates. | SSP5 includes strong investments in education. | Graduation rates increase to 120% (gross) by 2085 up from 61% in 2025. | 1.02 | 3 |
| *SSP5* | edsecupprtranm | World | A multiplier on upper secondary transition rates. | SSP5 includes strong investments in education. | This increases transition to 100% by 2050 up from 94% in 2025. | 1.02 | 3 |
| *SSP5* | edtergradm | World | A multiplier on tertiary graduation rates. | SSP5 includes strong investments in education. | This increases transition to 81% by 2150 (highest tertiary graduation in 2025 is 70%) up from 29% in 2025. | 1.02 | 3 |
| *SSP5* | edterintm | World | A multiplier on tertiary intake rates. | SSP5 includes strong investments in education. | Increases from 50% in 2025 to 100% in 2080. | 1.02 | 3 |
| *SSP5* | envco2fert | World | A switch to turn off the effect of CO2 fertilization on crops. | There are no climate impacts in the SSPs. | n/a | 0 | 0 |
| *SSP5* | firmtaxrm | World | A multiplier on the tax rate paid by firms. | SSP5 focuses on market driven solutions. | This reduces firm tax rates from 3.3% of GDP in 2025 to 1.8% by 2150. | 0.6 | 1 |
| *SSP5* | gdpinformshrm | World | The share of the economy that is informal. | SSP5 focuses on market driven solutions. | This decreases the share of the global informal economy from 5% of GDP in 2025 to 1.2% by 2150. | 0.4775 | 1 |
| *SSP5* | gdprext | World | A parameter to make GDP growth in IFs endogenous when set to -100. | Endogenous IFs behavior is the goal. | n/a | -100 | -100 |
| *SSP5* | gdsm | World | A multiplier on government spending. | SSP5 has strong spending on social programs. | This increases spending on education from 4.8% of GDP in 2025 to 9.8% by 2150. | 1 | 1.2 |
| *SSP5* | gdsm | World | A multiplier on government spending. | SSP5 has strong spending on social programs. | This increases spending on health from 5.9% of GDP in 2025 to 8.5% in 2150. | 1 | 1.2 |
| *SSP5* | gdsm | World | A multiplier on government spending. | SSP5 has strong spending on social programs. | In spite of this intervention, spending on infrastructure (core only) declines from 1.4% of GDP in 2025 to 0.7% by 2150. | 1 | 1.2 |
| *SSP5* | ginidomm | World | A multiplier on the Gini coefficient for income inequality. | There are generally positive development outcomes in SSP5. | This reduces the Gini coefficient for income inequality from 0.37 in 2025 to 0.21 in 2150, the level of the most equal countries in the world in 2025. | 0.5229 | 1 |
| *SSP5* | govindsecurconflict | World | The contribution of civil war onset to forward linkages. | We are isolating the effect of civil war onset on forward linkages as this reflects the approaches taken by others. | n/a | 1 | 1 |
| *SSP5* | govindsecurgovrisk | World | The contribution of the governance risk index to forward impacts. | We are not focused on the effect of state fragility indices as a part of this project. | n/a | 0 | 0 |
| *SSP5* | govindsecurviolence | World | The contribution to societal violence to forward impacts. | We are not focused on levels of homicide or other societal violence as a part of this project. | n/a | 0 | 0 |
| *SSP5* | hhtaxrm | World | A multiplier on the household tax rate paid. | SSP5 focuses on market driven solutions. | Tax rate grows from 23% of GDP in 2025 to 54% in 2150. | 0.7 | 1 |
| *SSP5* | hlmortm | World | A multiplier on cancer mortality. | SSP5 includes strong investments in health. | Decreases mortality from 3 deaths per thousand in 2025 to 2.3 in 2150. | 0.2 | 0.99 |
| *SSP5* | hlmortm | World | A multiplier on heart disease mortality. | SSP5 includes strong investments in health. | Decreases mortality from 2.6 deaths per thousand in 2025 to 1.4 in 2150. | 0.2 | 0.9927 |
| *SSP5* | hlmortm | World | A multiplier on other non-communicable disease mortality. | SSP5 includes strong investments in health. | Decreases mortality from 0.4 deaths per thousand in 2025 to 0.1 in 2150. | 0.2 | 0.99 |
| *SSP5* | hlmortm | World | A multiplier on respiratory non-communicable disease mortality. | SSP5 includes strong investments in health. | Increases mortality from 0.6 deaths per thousand in 2025 to 3.2 in 2150. | 0.2 | 0.992 |
| *SSP5* | hlmortm | World | A multiplier on digestive communicable disease mortality. | SSP5 includes strong investments in health. | Increases mortality from 0.4 deaths per thousand in 2025 to 2.1 in 2150. | 0.2 | 0.992 |
| *SSP5* | hlmortm | World | A multiplier on traffic accident mortality. | SSP5 includes strong investments in health. | Maintains the mortality rate per thousand at 0.2. | 0.2 | 0.992 |
| *SSP5* | hlmortm | World | A multiplier on intentional injuries (murder, suicide) mortality. | SSP5 includes strong investments in health. | Maintains the mortality rate per thousand at 0.2. | 0.2 | 0.9933 |
| *SSP5* | hlmortm | World | A multiplier on unintentional injury mortality. | SSP5 includes strong investments in health. | Increases mortality from 0.3 deaths per thousand in 2025 to 2 in 2150. | 0.2 | 1 |
| *SSP5* | hlmortm | World | A multiplier on other communicable disease mortality. | SSP5 includes strong investments in health. | Decreases mortality from 0.6 deaths per thousand in 2025 to 0.08 in 2150. | 0.33 | 0.9916 |
| *SSP5* | hlmortm | World | A multiplier on neuropsychiatric mortality. | SSP5 includes strong investments in health. | Increases mortality from 0.4 deaths per thousand in 2025 to 2.3 in 2150. | 0.2 | 0.99 |
| *SSP5* | hlmortm | World | A multiplier on diabetes mortality. | SSP5 includes strong investments in health. | Increases mortality from 0.2 deaths per thousand in 2025 to 1.6 in 2150. | 0.3 | 0.9912 |
| *SSP5* | hlmortm | World | A multiplier on AIDS mortality. | SSP5 includes strong investments in health. | Decreases mortality from 0.015 deaths per thousand in 2025 to 0 in 2150. | 0.3 | 0.976 |
| *SSP5* | hlmortm | World | A multiplier on diarrheal mortality. | SSP5 includes strong investments in health. | Reduces mortality from 0.2 deaths per thousand in 2025 to 0.07 by 2085, then increases to 0.2 in 2150. | 0.15 | 0.984 |
| *SSP5* | hlmortm | World | A multiplier on malaria mortality. | SSP5 includes strong investments in health. | Decreases mortality from 0.1 deaths per thousand in 2025 to 0.002 in 2150. | 0.3 | 0.9844 |
| *SSP5* | hlmortm | World | A multiplier on respiratory infection mortality. | SSP5 includes strong investments in health. | Decreases mortality from 0.3 deaths per thousand in 2025 to 0.2 in 2085, then increases to 0.7 by 2150. | 0.4 | 0.9829 |
| *SSP5* | mfpadd | World | An additive parameter changing multifactor productivity. | SSP5 focuses on market driven solutions. | Increases to 0.01 by 2035 interpolated from a value of zero in 2025 annually. This is maintained until 2060. Then it grows to 0.02 by 2105 interpolated from the 2060 value annually. This is maintained through 2150. | 0.0012 | 0.02 |
| *SSP5* | sanitationm | World | A multiplier on the share of the population using unimproved sanitation. | SSP5 includes strong investments in health. | Access to improved sanitation grows from 87% in 2025 to 99% in 2150. | 0.8 | 1 |
| *SSP5* | watsafefwdsw | World | A switch turning on the forward impact of water and sanitation to development. |  | n/a | 0 | 0 |
| *SSP5* | watsafem | World | A multiplier on the share of the population using unimproved water. | SSP5 includes strong investments in health. | Improved access grows from 94% in 2025 to 100% by 2150. | 0.8 | 1 |
| *SSP5* | wmigrm | World | A multiplier on world migration. | SSP5 assumes higher migration. | Increases migration from 0.17% of global population to 0.32% by 2100. | 1 | 3 |
| *SSP5* | xshift | World | A shift in the openness of global trade. | SSP5 focuses on market driven solutions. | Increases trade openness from 27.7% in 2025 to 50.6% by 2150. | 0.02 | 0.02 |

1. United Nations, Department of Economic and Social Affairs, Population Division. *World Population Prospects 2024, Data Sources*. (2024).

2. Burgess, M. G. *et al.* Multidecadal dynamics project slow 21st-century economic growth and income convergence. *Commun Earth Environ* **4**, 1–10 (2023).

3. Hughes, B. B. *International Futures: Building and Using Global Models*. (Academic Press, an imprint of Elsevier, London, United Kingdom ; San Diego, CA, 2019).

4. Hughes, B. B. & Narayan, K. Enhancing integrated analysis of national and global goal pursuit by endogenizing economic productivity. *PLOS ONE* **16**, e0246797 (2021).

5. Walras, L. *Elements of Pure Economics*. (Published by Allen and Unwin, London, 1954).

6. Cobb, C. W. & Douglas, P. H. A Theory of Production. *The American Economic Review* **18**, 139–165 (1928).

7. Solow, R. M. A Contribution to the Theory of Economic Growth. *The Quarterly Journal of Economics* **70**, 65 (1956).

8. Aguiar, A., Chepeliev, M., Corong, E., McDougall, R. & van der Mensbrugghe, D. The GTAP Data Base: Version 10. *Journal of Global Economic Analysis* **4**, 1–27 (2019).

9. World Bank. World Development Indicators. (2024).

10. Friedman, M. *A Theory of the Consumption Function.* (Princeton University Press, New Jersey, 1957).

11. Dickson, J. R., Hughes, B. B. & Irfan, M. T. Advancing Global Education: Patterns of Potential Human Progress, Vol. 2. *Population and Development Review* **37**, 403–404 (2011).

12. Dickson, J. R., Irfan, M. T. & Hughes, B. B. USE 2030: Exploring impacts, costs, and financing. in *Background Paper for the International Commission on Financing Global Education Opportunity* (Frederick S. Pardee Center for International Futures Josef Korbel School of International Studies University of Denver, 2016).

13. Irfan, M. T., O’Neill, B., Hughes, B. B. & Moyer, J. D. The importance of schooling for modeling long-term educational attainment: understanding future adaptive capacity. *Under Review* (2024).

14. Hughes, B. B., Joshi, D. K., Moyer, J. D., Sisk, T. D. & Solorzano, J. R. *PPHP 5: Strengthening Governance Globally: Forecasting the next 50 Years*. vol. 5 (Pardee Center for International Futures, University of Denver; Paradigm; Oxford University Press, 2014).

15. Joshi, D. K., Hughes, B. B. & Sisk, T. D. Improving Governance for the Post-2015 Sustainable Development Goals: Scenario Forecasting the Next 50years. *World Development* **70**, 286–302 (2015).

16. Moyer, J. D. Blessed are the peacemakers: The future burden of intrastate conflict on poverty. *World Development* **165**, 106–188 (2023).

17. Daniel Kaufmann, Aart Kraay, & Massimo Mastruzzi. *The Worldwide Governance Indicators: Methodology and Analytical Issues*. https://papers.ssrn.com/abstract=1682130 (2010).

18. Transparency International. *Corruption Perceptions Index 2019*. (Transparency International, Berlin, 2020).

19. Marshall, M. G., Gurr, T. R. & Jaggers, K. Polity IV project: Political regime characteristics and transitions, 1800–2016. (2017).

20. Rothman, D. S., Irfan, M. T., Margolese-Malin, E., Hughes, B. B. & Moyer, J. D. *PPHP 4: Building Global Infrastructure: Forecasting the next 50 Years*. vol. 4 (Pardee Center for International Futures, University of Denver; Paradigm; Oxford University Press, Denver, CO, 2014).

21. Sahavadevan, D. *et al.*

22. Moyer, J. D. & Hughes, B. B. ICTs: Do they contribute to increased carbon emissions? *Technological Forecasting and Social Change* **79**, 919–931 (2012).

23. Hedden, S. *et al.* *Eliminating Hunger in Africa - the Elimination of Hunger and Food Insecurity on the African Continent by 2025 - Conditions for Success*. 62 https://pardee.du.edu/ending-hunger-africa-elimination-hunger-and-food-insecurity-african-continent-2025-conditions (2016).

24. Verhagen, W. *et al.* Policy strategies to achieve zero hunger by 2040 at the country-level. (Under Review at Nature Food).

25. Azcona, G. & Bhatt, A. Poverty deepens for women and girls, according to latest projections. *UN Women Data Hub* https://data.unwomen.org/features/poverty-deepens-women-and-girls-according-latest-projections (2022).

26. Hughes, B. B., Solorzano, J. R. & Rothman, D. S. *IFs Energy Model Documentation*. (2014).

27. Moyer, J. D. *et al.* How many people is the COVID-19 pandemic pushing into poverty? A long-term forecast to 2050 with alternative scenarios. *PLOS ONE* **17**, e0270846 (2022).

28. Moyer, J. D. A double-edged sword into a plowshare: Analyzing geopolitical implications of alternative socioeconomic development pathways. *One Earth* (2024) doi:10.1016/j.oneear.2024.01.002.

29. Moyer, J. D., Meisel, C. J. & Matthews, A. S. Measuring and Forecasting the Rise of China: Reality over Image. *Journal of Contemporary China* **32**, 191–206 (2023).

30. O’Neill, B. C. *et al.* The roads ahead: Narratives for shared socioeconomic pathways describing world futures in the 21st century. *Global Environmental Change* **42**, 169–180 (2017).

31. Moyer, J. D. & Hedden, S. Are we on the right path to achieve the sustainable development goals? *World Development* **127**, 104749 (2020).

32. Moyer, J. D. *et al.* How many people will live in poverty because of climate change? A macro-level projection analysis to 2070. *Climatic Change* **176**, 137 (2023).
